# Supplementary material for: Nanostructured supramolecular networks from self-assembled diamondoid molecules under ultracold conditions
Source: PubMed Central journal article supplement (PMC10336979; doi:10.1039/d3cp02367b), 2023-06-13
Supplement: CP-025-D3CP02367B-s002.pdf [file CP-025-D3CP02367B-s002.pdf]

Supporting information

## **Nanostructured supramolecular networks from self-assembled diamondoid molecules at ultracold conditions**

Marija Alešković,<sup>a, ‡</sup> Florian Küstner,<sup>b, ‡</sup> Roman Messner,<sup>b</sup> Florian Lackner<sup>b,\*</sup> Wolfgang E. Ernst,<sup>b,\*</sup>  
Marina Šekutor<sup>a,\*</sup>

<sup>a</sup> Department of Organic Chemistry and Biochemistry, Ruđer Bošković Institute, Bijenička cesta 54, 10 000 Zagreb, Croatia, [msekutor@irb.hr](mailto:msekutor@irb.hr)

<sup>b</sup> Institute of Experimental Physics, Graz University of Technology, Petersgasse 16, 8010 Graz, Austria, [wolfgang.ernst@tugraz.at](mailto:wolfgang.ernst@tugraz.at), [florian.lackner@tugraz.at](mailto:florian.lackner@tugraz.at)

<sup>‡</sup>Both contributors are considered first authors.

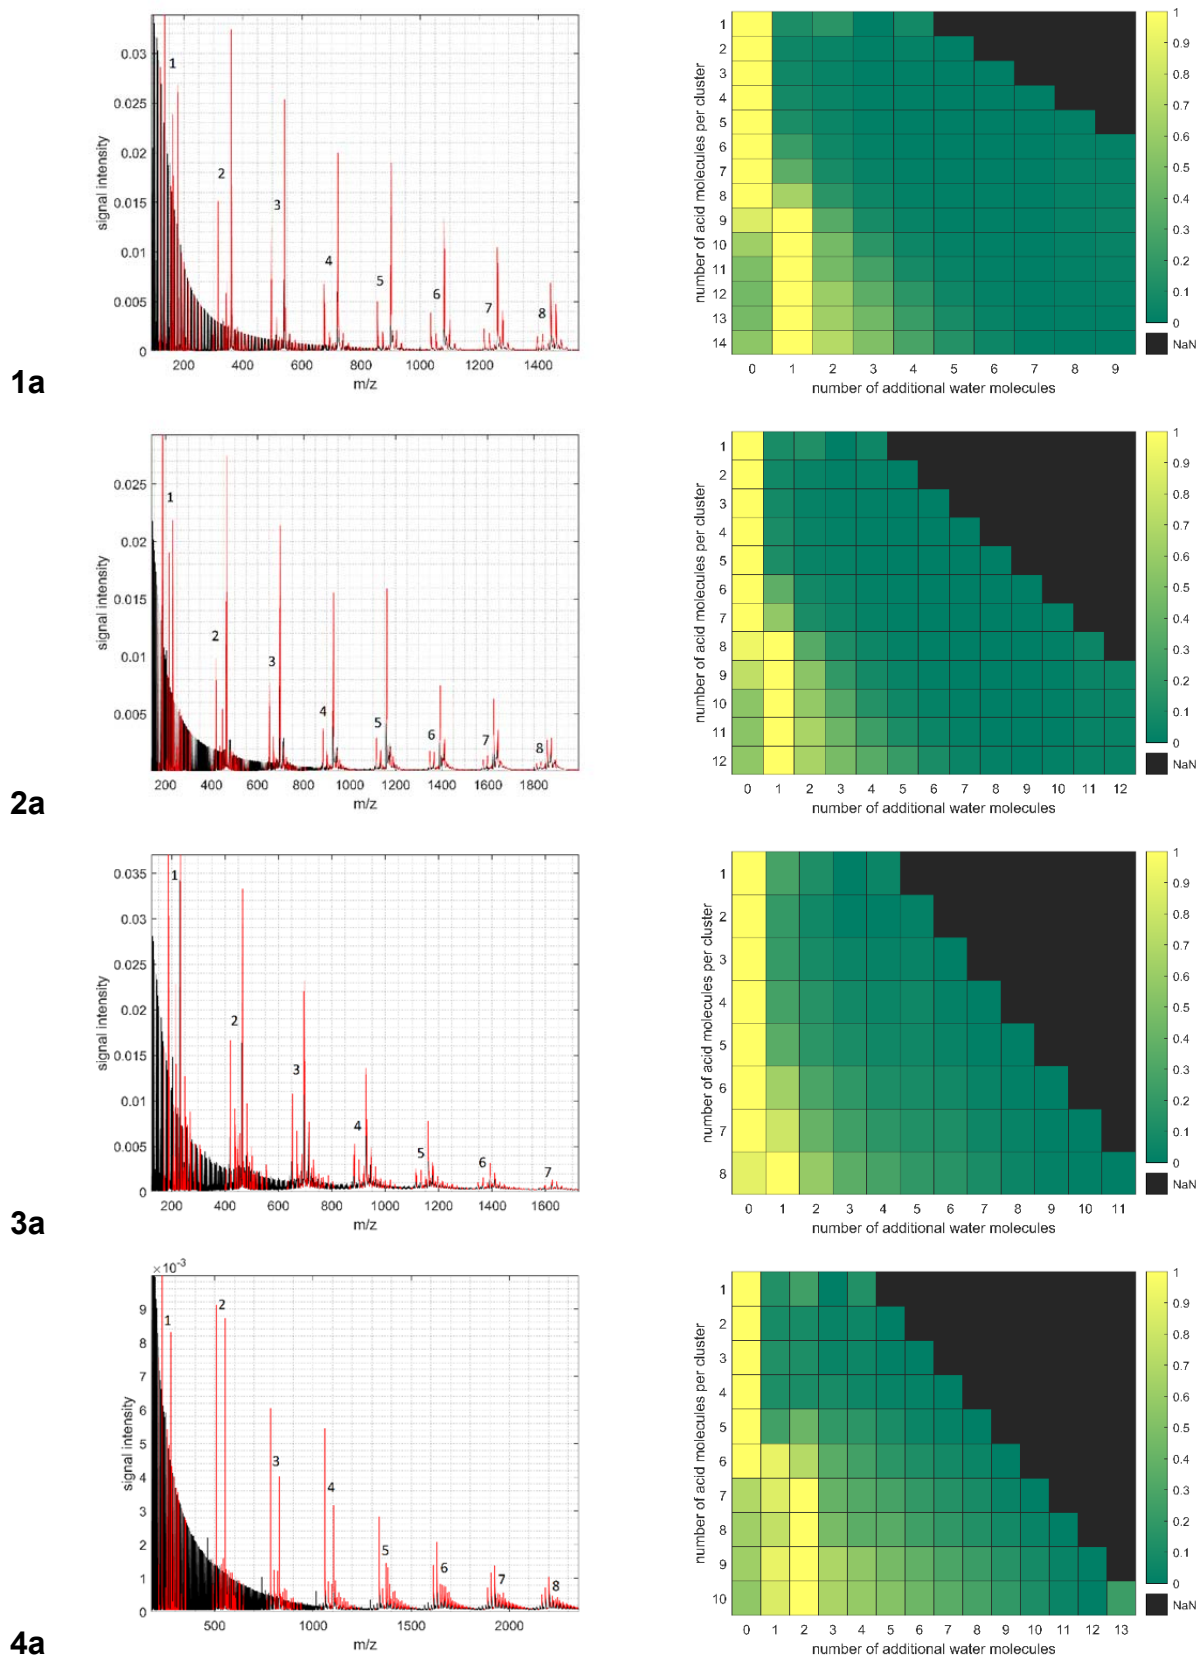

**Figure S1.** Excerpt of the measured TOF spectrum with indication of the corresponding cluster size (left column) and integrated peak area, resolved according to attached water molecules, linewise scaled (right column) for acids **1a**, **2a**, **3a** and **4a**.

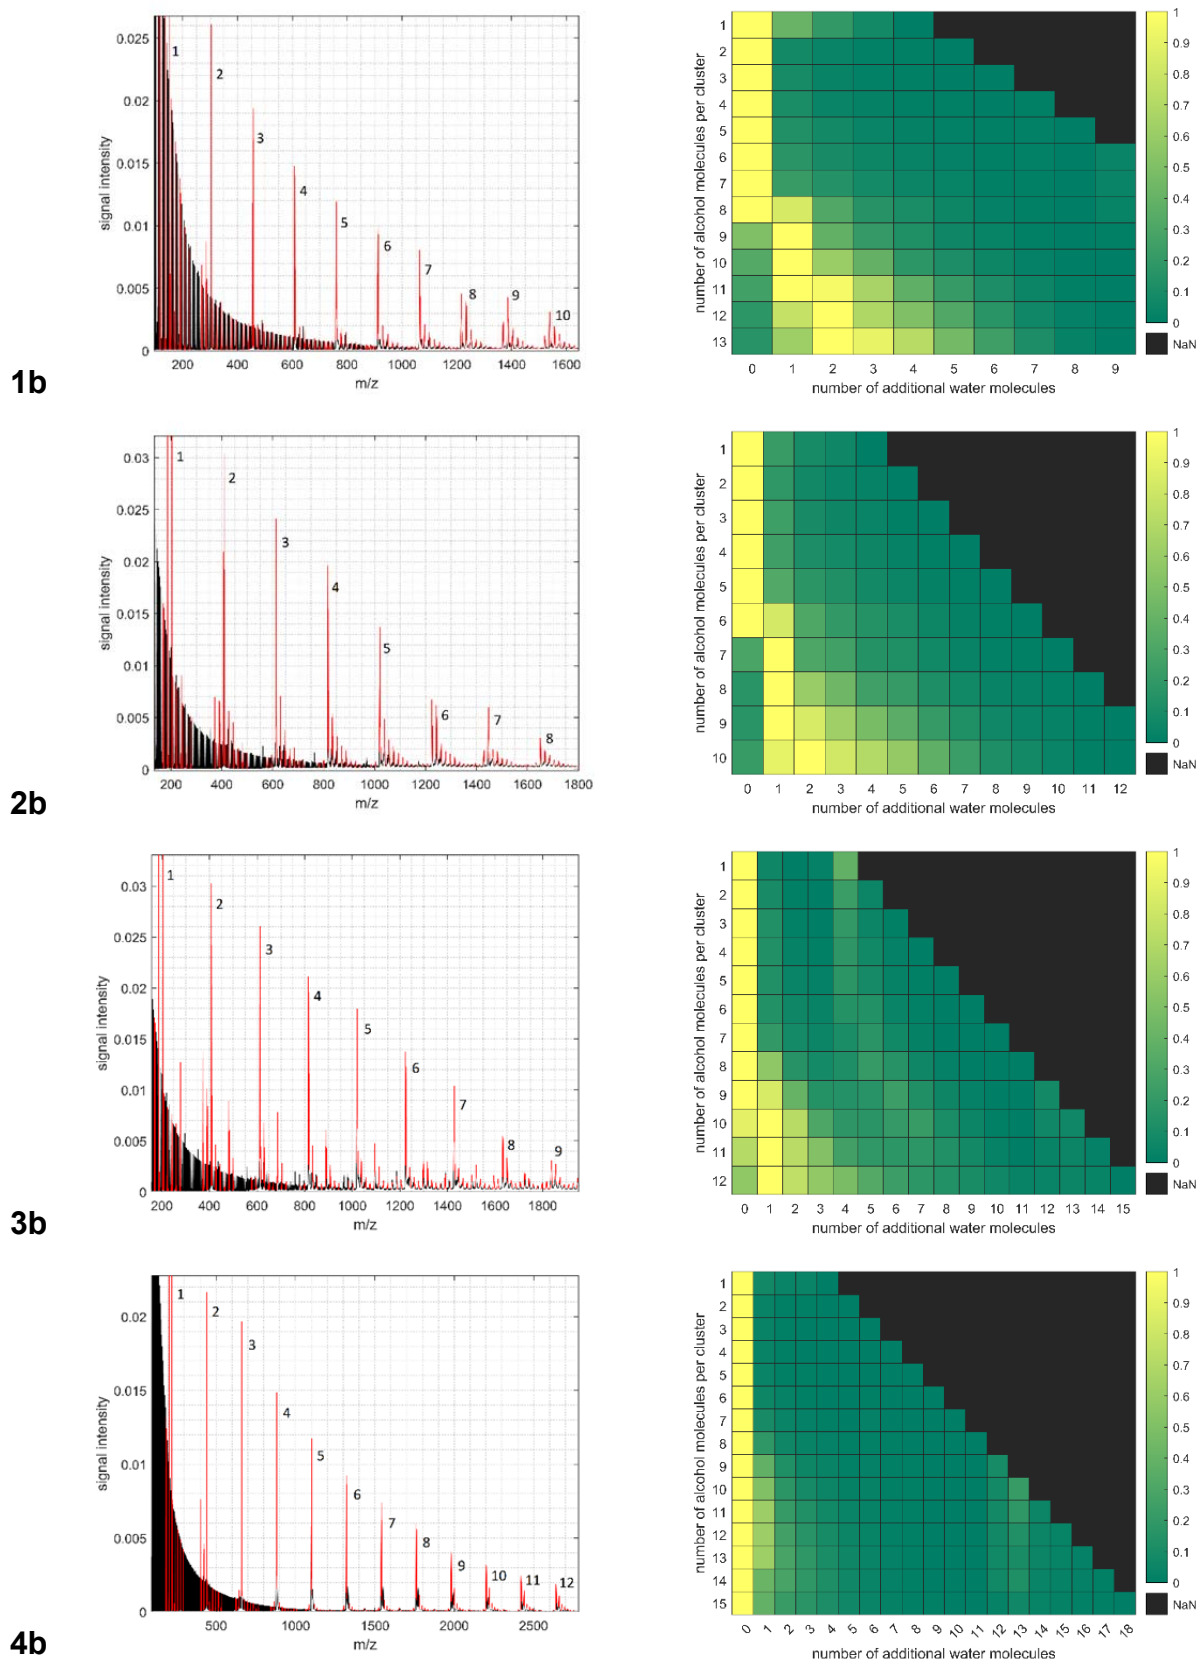

**Figure S2.** Excerpt of the measured TOF spectrum with indication of the corresponding cluster size (left column) and integrated peak area, resolved according to attached water molecules, linewise scaled (right column) for alcohols **1b**, **2b**, **3b** and **4b**.

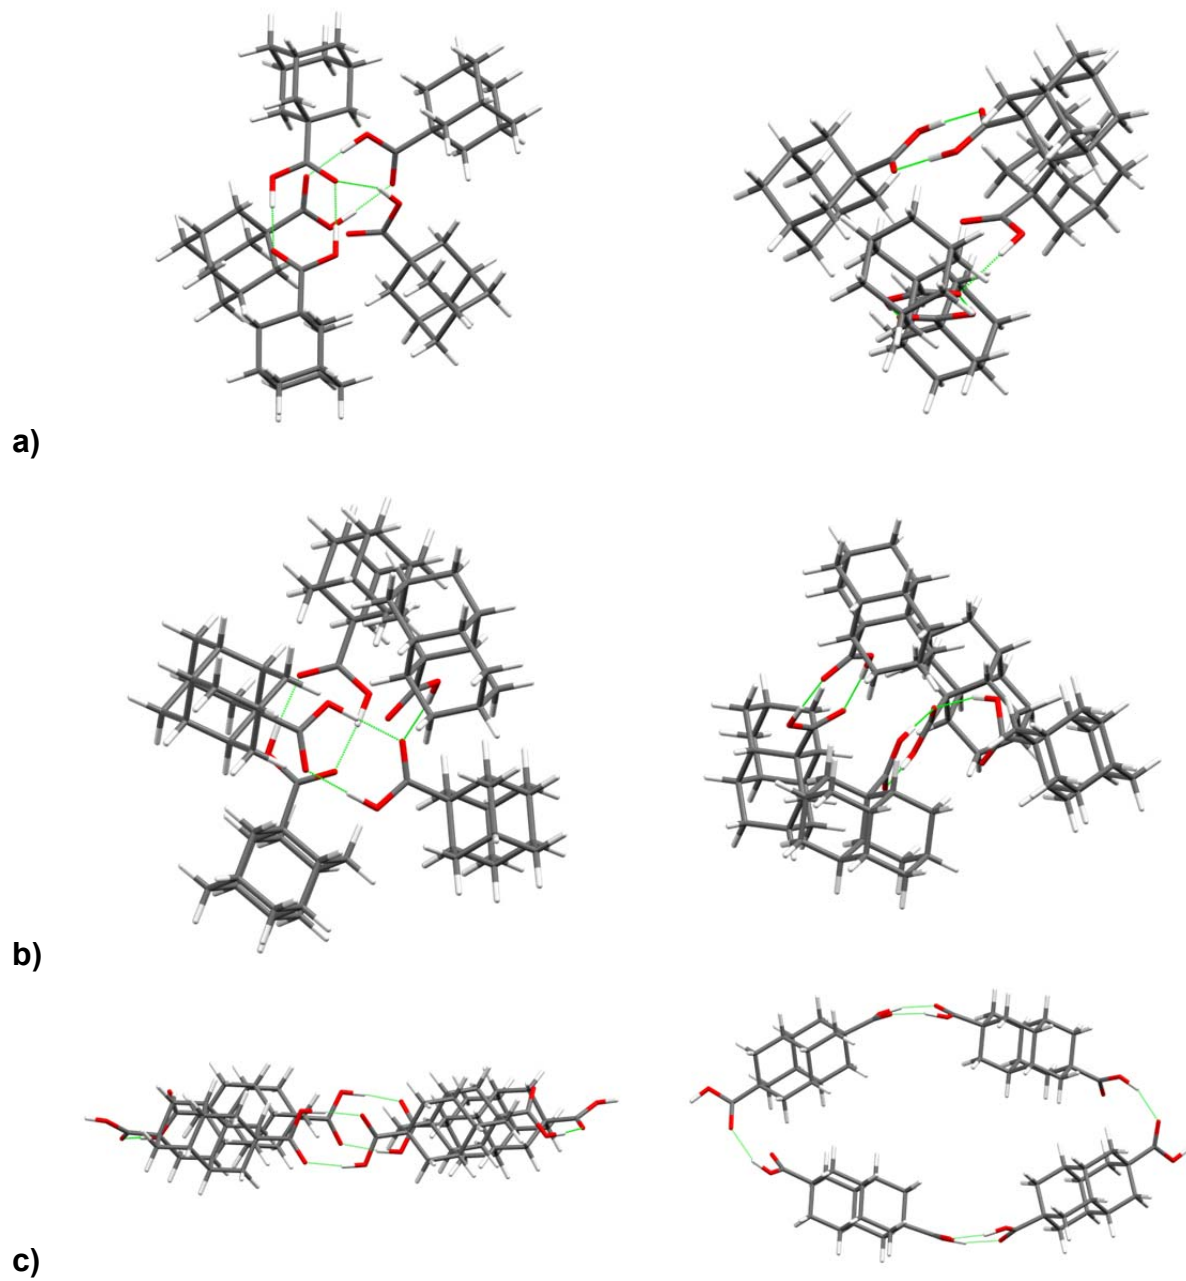

**Figure S3.** Representations of the minimized geometries of acid clusters a) 1aCL5, b) 2aCL5 and c) 4aCL4.

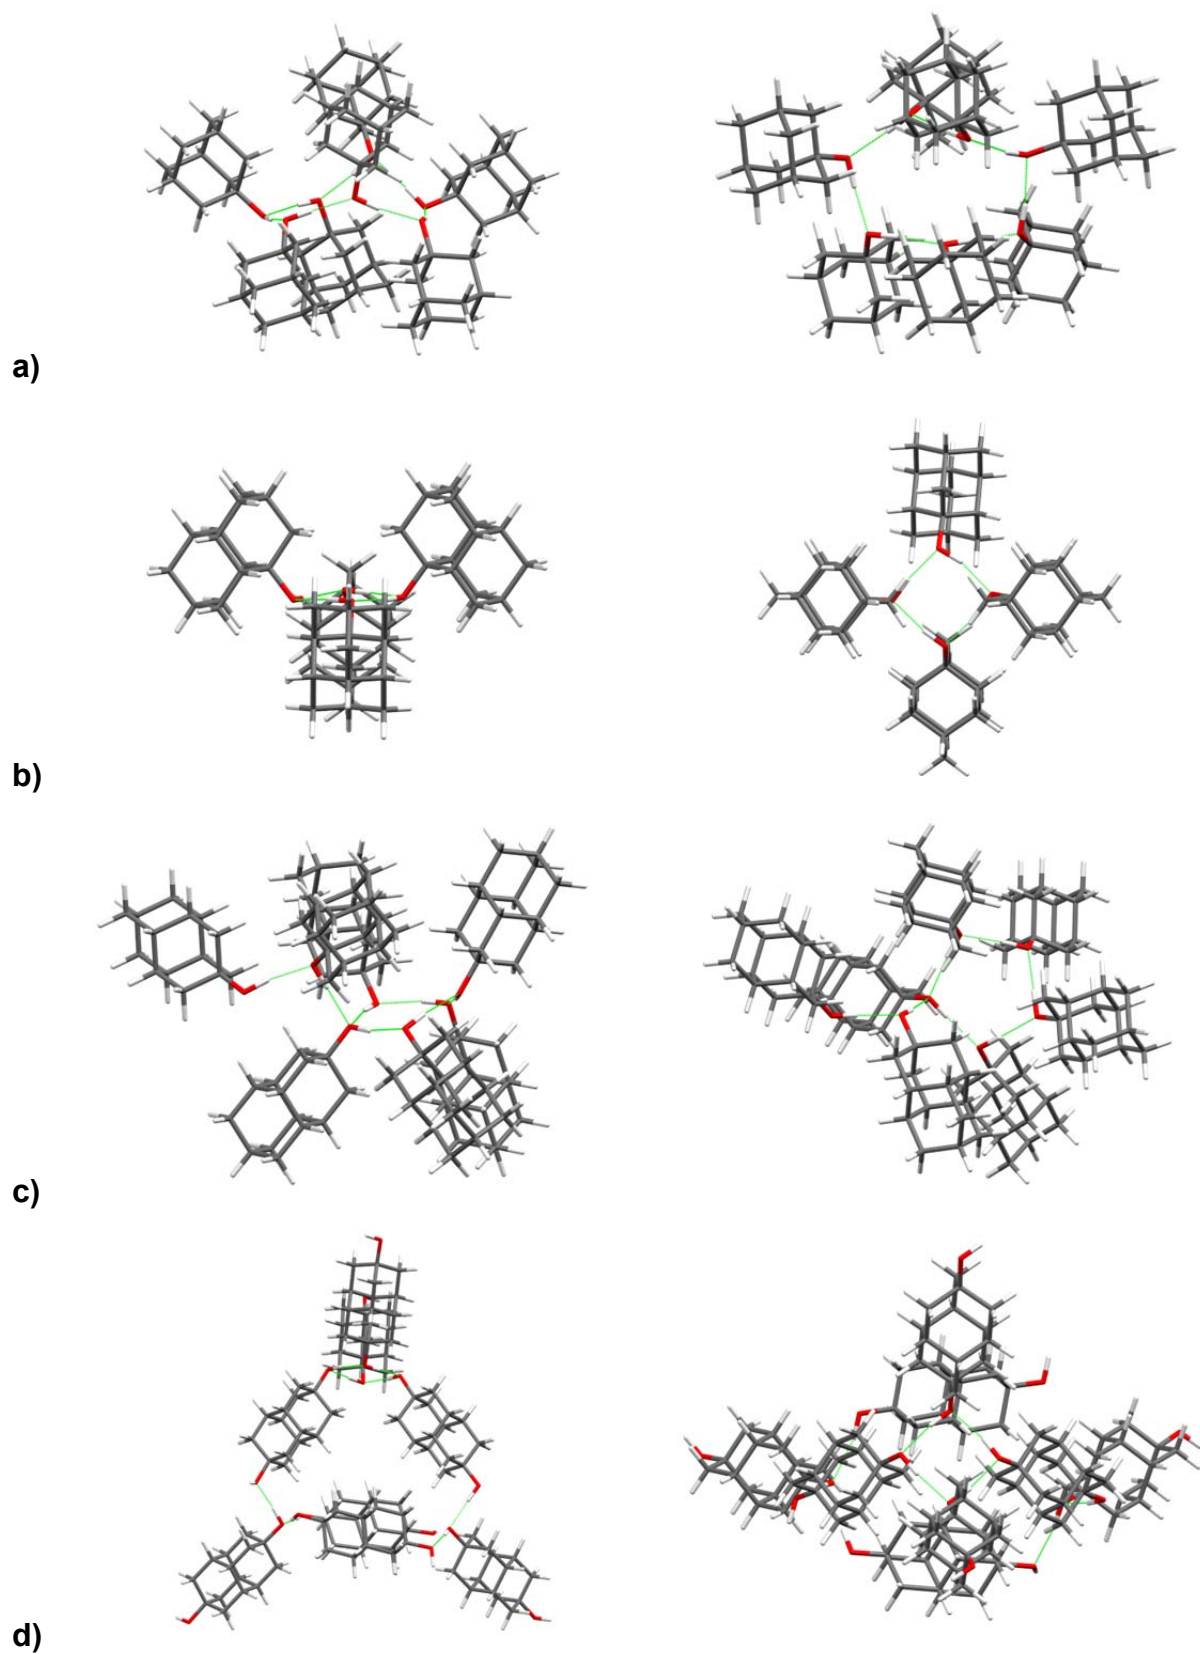

**Figure S4.** Representations of the minimized geometries of alcohol clusters a) **1bCL7**, b) **2bCL4**, c) **3bCL7**, and d) **4bCL8**.

**Table S1.** Electronic energies, zero-point vibrational energies, enthalpies and Gibbs energies of acids **1a**, **2a** and **4a** and clusters **1aCL5**, **2aCL5** and **4aCL4** in Hartree computed using the GFN2-xTB method at 0.4 K.

| compound     | <i>E</i>    | <i>ZPVE</i> | <i>H</i>    | <i>G</i>    |
|--------------|-------------|-------------|-------------|-------------|
| <b>1a</b>    | -39.929926  | 0.253488    | -39.676433  | -39.676444  |
| <b>2a</b>    | -50.584295  | 0.325164    | -50.259126  | -50.259139  |
| <b>4a</b>    | -60.875108  | 0.337936    | -60.537167  | -60.537178  |
| <b>1aCL5</b> | -199.752051 | 1.271355    | -198.480691 | -198.480689 |
| <b>2aCL5</b> | -253.024316 | 1.628842    | -251.395470 | -251.395468 |
| <b>4aCL4</b> | -243.585872 | 1.355109    | -242.230759 | -242.230761 |

**Table S2.** Electronic energies, zero-point vibrational energies, enthalpies and Gibbs energies of alcohols **1b–4b** and clusters **1bCL7**, **2bCL4**, **3bCL7**, and **4bCL8** in Hartree computed using the GFN2-xTB method at 0.4 K.

| compound     | <i>E</i>    | <i>ZPVE</i> | <i>H</i>    | <i>G</i>    |
|--------------|-------------|-------------|-------------|-------------|
| <b>1b</b>    | -33.704610  | 0.243272    | -33.461333  | -33.461344  |
| <b>2b</b>    | -44.357360  | 0.314866    | -44.042488  | -44.042501  |
| <b>3b</b>    | -44.358251  | 0.314828    | -44.043418  | -44.043431  |
| <b>4b</b>    | -48.423368  | 0.317556    | -48.105806  | -48.105819  |
| <b>1bCL7</b> | -236.047323 | 1.712012    | -234.335306 | -234.335295 |
| <b>2bCL4</b> | -177.490809 | 1.264303    | -176.226501 | -176.226505 |
| <b>3bCL7</b> | -310.626979 | 2.212890    | -308.414084 | -308.414073 |
| <b>4bCL8</b> | -387.528230 | 2.551637    | -384.976588 | -384.976574 |

**Table S3.** Electronic energies of acids **1a**, **2a** and **4a** and clusters **1aCL5**, **2aCL5** and **4aCL4** in Hartree and interaction energies,  $\Delta H(0\text{ K})$ ,<sup>a</sup> for clusters **1aCL5**, **2aCL5** and **4aCL4** in kcal mol<sup>-1</sup> computed at the B3LYP-gCP-D3(BJ)-ABC/def2-TZVPP level of theory.

| compound  | <i>E</i>    | compound     | <i>E</i>     | $\Delta H$ |
|-----------|-------------|--------------|--------------|------------|
| <b>1a</b> | -579.201550 | <b>1aCL5</b> | -2896.093007 | -51.0      |
| <b>2a</b> | -734.016107 | <b>2aCL5</b> | -3670.174230 | -56.9      |

|           |             |              |              |       |
|-----------|-------------|--------------|--------------|-------|
| <b>4a</b> | -922.595452 | <b>4aCL4</b> | -3690.461279 | -47.8 |
|-----------|-------------|--------------|--------------|-------|

<sup>a</sup> Interaction energies are defined as a difference between the energy of the cluster and the energy of the corresponding number of acid molecules. *ZPVE* taken from GFN2-xTB computations.

**Table S4.** Electronic energies of alcohols **1b–4b** and clusters **1bCL7**, **2bCL4**, **3bCL7**, and **4bCL8** in Hartree and interaction energies,  $\Delta H(0\text{ K})$ ,<sup>a</sup> for clusters **1bCL7**, **2bCL4**, **3bCL7**, and **4bCL8** in kcal mol<sup>-1</sup> computed at the B3LYP-gCP-D3(BJ)-ABC/def2-TZVPP level of theory.

| compound  | <i>E</i>    | compound     | <i>E</i>     | $\Delta H$ |
|-----------|-------------|--------------|--------------|------------|
| <b>1b</b> | -465.850011 | <b>1bCL7</b> | -3261.070347 | -69.8      |
| <b>2b</b> | -620.665476 | <b>2bCL4</b> | -2482.727192 | -37.9      |
| <b>3b</b> | -620.667380 | <b>3bCL7</b> | -4344.790221 | -68.7      |
| <b>4b</b> | -695.895351 | <b>4bCL8</b> | -5567.294909 | -75.9      |

<sup>a</sup> Interaction energies are defined as a difference between the energy of the cluster and the energy of the corresponding number of alcohol molecules. *ZPVE* taken from GFN2-xTB computations.

**Table S5.** Geometries of acids **1a**, **2a** and **4a** and clusters **1aCL5**, **2aCL5** and **4aCL4** in Cartesian coordinates in Å computed using the GFN2-xTB method at 0.4 K.

| <b>1a</b> |              |              |              |
|-----------|--------------|--------------|--------------|
| 1         | -0.098928000 | 3.524137000  | -1.170693000 |
| 8         | 0.048681000  | 2.570037000  | -1.105971000 |
| 6         | 1.152588000  | 0.740716000  | -2.180670000 |
| 6         | 1.930254000  | 0.352272000  | -0.897597000 |
| 6         | 2.262983000  | -1.147380000 | -0.928116000 |
| 1         | 1.330187000  | 0.590163000  | -0.017329000 |
| 1         | 2.849614000  | 0.942277000  | -0.835284000 |
| 6         | 2.012405000  | 0.409898000  | -3.413153000 |
| 6         | 2.341650000  | -1.089644000 | -3.435639000 |
| 1         | 2.929572000  | 1.002464000  | -3.389631000 |
| 1         | 1.477757000  | 0.699564000  | -4.320802000 |
| 6         | 3.120445000  | -1.461752000 | -2.163968000 |
| 1         | 4.059198000  | -0.900683000 | -2.122692000 |
| 1         | 3.381848000  | -2.524268000 | -2.178594000 |
| 6         | -0.155641000 | -0.086934000 | -2.234709000 |
| 6         | 0.958653000  | -1.959145000 | -0.989609000 |
| 1         | 2.815257000  | -1.405497000 | -0.020155000 |
| 6         | 1.038644000  | -1.902115000 | -3.496358000 |
| 1         | 2.951531000  | -1.307001000 | -4.316731000 |
| 6         | 0.180537000  | -1.585998000 | -2.261583000 |
| 1         | -0.725934000 | 0.186703000  | -3.127611000 |
| 1         | -0.776699000 | 0.147052000  | -1.368180000 |
| 1         | 0.349332000  | -1.760983000 | -0.102360000 |
| 1         | 1.185019000  | -3.029735000 | -0.990794000 |
| 1         | -0.751471000 | -2.156683000 | -2.303167000 |
| 1         | 0.486523000  | -1.661016000 | -4.410145000 |
| 1         | 1.263371000  | -2.972568000 | -3.531012000 |
| 6         | 0.833236000  | 2.222616000  | -2.158959000 |
| 8         | 1.211163000  | 3.039852000  | -2.959584000 |

| <b>2a</b> |              |              |              |
|-----------|--------------|--------------|--------------|
| 1         | -2.103547000 | -0.423627000 | -0.570172000 |
| 6         | -2.126946000 | 1.631517000  | -3.046781000 |
| 6         | -2.104412000 | 2.982008000  | -2.281564000 |
| 6         | -2.586102000 | 4.114006000  | -3.193324000 |
| 6         | -1.661950000 | 4.205185000  | -4.413627000 |
| 6         | -1.696053000 | 2.880072000  | -5.181612000 |
| 1         | -0.638751000 | 4.427044000  | -4.094485000 |
| 1         | -1.979174000 | 5.024188000  | -5.066917000 |
| 6         | -1.210211000 | 1.713875000  | -4.294050000 |
| 1         | -1.086287000 | 3.180483000  | -1.934454000 |
| 1         | -2.743667000 | 2.907244000  | -1.398120000 |
| 6         | -3.130406000 | 2.575697000  | -5.662738000 |
| 1         | -1.034294000 | 2.946817000  | -6.051499000 |
| 6         | -4.019097000 | 3.815047000  | -3.651343000 |
| 1         | -2.561704000 | 5.055078000  | -2.636578000 |
| 6         | -3.569506000 | 1.324679000  | -3.531351000 |
| 6         | -4.044785000 | 2.492001000  | -4.423560000 |
| 1         | -5.068818000 | 2.278686000  | -4.747983000 |
| 1         | -4.686838000 | 3.757533000  | -2.785762000 |
| 1         | -4.388906000 | 4.625711000  | -4.287095000 |



|   |              |              |              |
|---|--------------|--------------|--------------|
| 6 | -1.601133000 | 0.598477000  | -2.064811000 |
| 6 | -1.250737000 | 0.401866000  | -5.091059000 |
| 1 | -0.187715000 | 1.908411000  | -3.963538000 |
| 6 | -3.169452000 | 1.259960000  | -6.447895000 |
| 1 | -3.471759000 | 3.395934000  | -6.303468000 |
| 6 | -3.602525000 | 0.010059000  | -4.323277000 |
| 1 | -4.226997000 | 1.248065000  | -2.663261000 |
| 6 | -2.686193000 | 0.112354000  | -5.551239000 |
| 1 | -2.534548000 | 1.335990000  | -7.336441000 |
| 1 | -4.188170000 | 1.064534000  | -6.798392000 |
| 1 | -4.630177000 | -0.198662000 | -4.636608000 |
| 1 | -3.293211000 | -0.823249000 | -3.685740000 |
| 1 | -0.867329000 | -0.419858000 | -4.483498000 |
| 1 | -0.590131000 | 0.489463000  | -5.959188000 |
| 1 | -2.712187000 | -0.828979000 | -6.107202000 |
| 8 | -2.547242000 | 0.177394000  | -1.185498000 |
| 8 | -0.461995000 | 0.212625000  | -1.989167000 |

---

**4a**

|   |              |             |              |
|---|--------------|-------------|--------------|
| 1 | 0.833661000  | 2.250137000 | -2.675955000 |
| 6 | 1.659620000  | 3.354243000 | 0.227105000  |
| 6 | 2.098272000  | 4.751452000 | 0.692025000  |
| 6 | 2.379931000  | 4.740182000 | 2.197098000  |
| 6 | 1.117586000  | 4.335703000 | 2.983203000  |
| 6 | 0.677484000  | 2.936971000 | 2.507964000  |
| 1 | 0.317454000  | 5.052833000 | 2.772043000  |
| 6 | 1.392054000  | 4.328339000 | 4.490193000  |
| 6 | 0.387275000  | 2.941624000 | 1.004058000  |
| 1 | 1.320286000  | 5.480113000 | 0.453320000  |
| 1 | 2.990017000  | 5.057679000 | 0.140518000  |
| 6 | 1.800240000  | 1.933467000 | 2.839070000  |
| 1 | -0.232175000 | 2.645404000 | 3.043413000  |
| 6 | 3.501919000  | 3.738384000 | 2.533696000  |
| 1 | 2.690945000  | 5.742499000 | 2.508945000  |
| 6 | 2.783841000  | 2.342038000 | 0.549361000  |
| 6 | 3.063643000  | 2.340399000 | 2.055447000  |
| 1 | 3.863171000  | 1.622652000 | 2.266826000  |
| 1 | 4.412123000  | 4.029565000 | 1.999473000  |
| 6 | 3.788267000  | 3.728606000 | 4.037732000  |
| 6 | 1.375472000  | 3.367097000 | -1.261858000 |
| 1 | 0.056678000  | 1.953050000 | 0.679389000  |
| 1 | -0.421265000 | 3.644712000 | 0.781921000  |
| 1 | 1.488622000  | 0.931451000 | 2.526018000  |
| 6 | 2.076850000  | 1.918242000 | 4.345586000  |
| 1 | 2.492616000  | 1.344000000 | 0.216369000  |
| 1 | 3.690357000  | 2.615458000 | 0.000833000  |
| 8 | 0.995867000  | 2.148786000 | -1.727385000 |
| 6 | 2.523786000  | 3.324032000 | 4.810932000  |
| 1 | 2.859288000  | 1.188955000 | 4.576895000  |
| 1 | 1.180666000  | 1.616496000 | 4.890974000  |
| 1 | 4.124123000  | 4.713971000 | 4.368601000  |
| 1 | 4.597394000  | 3.031383000 | 4.266603000  |
| 1 | 0.488237000  | 4.054554000 | 5.037821000  |
| 1 | 1.683160000  | 5.329035000 | 4.823862000  |
| 8 | 1.457530000  | 4.323191000 | -1.989862000 |

|   |             |             |             |
|---|-------------|-------------|-------------|
| 1 | 1.986165000 | 2.980835000 | 7.960604000 |
| 8 | 1.716957000 | 2.961611000 | 7.031321000 |
| 6 | 2.806511000 | 3.312644000 | 6.299947000 |
| 8 | 3.859312000 | 3.576652000 | 6.822276000 |

---

**1aCL5**

|   |              |              |              |
|---|--------------|--------------|--------------|
| 1 | -1.097375000 | 0.700630000  | -2.602029000 |
| 8 | -0.217076000 | 0.311316000  | -2.889137000 |
| 6 | 1.258501000  | -1.551867000 | -2.853802000 |
| 6 | 1.382750000  | -1.600497000 | -4.384103000 |
| 6 | 2.726486000  | -2.224630000 | -4.758600000 |
| 1 | 1.309158000  | -0.589486000 | -4.789589000 |
| 1 | 0.566286000  | -2.195493000 | -4.801545000 |
| 6 | 1.344888000  | -2.971021000 | -2.290457000 |
| 6 | 2.688246000  | -3.587321000 | -2.670193000 |
| 1 | 0.524932000  | -3.573454000 | -2.687563000 |
| 1 | 1.238442000  | -2.940223000 | -1.206106000 |
| 6 | 2.813064000  | -3.641369000 | -4.192473000 |
| 1 | 2.013923000  | -4.258650000 | -4.609594000 |
| 1 | 3.766822000  | -4.094299000 | -4.473258000 |
| 6 | 2.398473000  | -0.698612000 | -2.284704000 |
| 6 | 3.862775000  | -1.379187000 | -4.185894000 |
| 1 | 2.811272000  | -2.260150000 | -5.851018000 |
| 6 | 3.817619000  | -2.739541000 | -2.087407000 |
| 1 | 2.746575000  | -4.602164000 | -2.262207000 |
| 6 | 3.736312000  | -1.327226000 | -2.664093000 |
| 1 | 2.293396000  | -0.644589000 | -1.201102000 |
| 1 | 2.325558000  | 0.315131000  | -2.682689000 |
| 1 | 3.818781000  | -0.368092000 | -4.597634000 |
| 1 | 4.825305000  | -1.813975000 | -4.465875000 |
| 1 | 4.550476000  | -0.716445000 | -2.255300000 |
| 1 | 3.723020000  | -2.701402000 | -1.000503000 |
| 1 | 4.784492000  | -3.187318000 | -2.330526000 |
| 6 | -0.068779000 | -0.923407000 | -2.486726000 |
| 8 | -0.945193000 | -1.539250000 | -1.899487000 |
| 1 | -2.336350000 | -0.996493000 | -1.375432000 |
| 8 | -3.209891000 | -0.615255000 | -1.016766000 |
| 6 | -4.631862000 | 1.257659000  | -0.766744000 |
| 6 | -4.818017000 | 2.688826000  | -1.271126000 |
| 6 | -6.082703000 | 3.283557000  | -0.656089000 |
| 1 | -4.890026000 | 2.686389000  | -2.360857000 |
| 1 | -3.950390000 | 3.291302000  | -0.998687000 |
| 6 | -4.507309000 | 1.259462000  | 0.764842000  |
| 6 | -5.769595000 | 1.866752000  | 1.372258000  |
| 1 | -3.627973000 | 1.833172000  | 1.064494000  |
| 1 | -4.378746000 | 0.235538000  | 1.119488000  |
| 6 | -5.949432000 | 3.297063000  | 0.866172000  |
| 1 | -5.090370000 | 3.905326000  | 1.157987000  |
| 1 | -6.841861000 | 3.740001000  | 1.313983000  |
| 6 | -5.847180000 | 0.409651000  | -1.165539000 |
| 6 | -7.293635000 | 2.442596000  | -1.057547000 |
| 1 | -6.212600000 | 4.308518000  | -1.020744000 |
| 6 | -6.980444000 | 1.024790000  | 0.972568000  |
| 1 | -5.672337000 | 1.873509000  | 2.463615000  |
| 6 | -7.108240000 | 1.013385000  | -0.550037000 |

---

|   |              |              |              |
|---|--------------|--------------|--------------|
| 1 | -5.709935000 | -0.614676000 | -0.814441000 |
| 1 | -5.937584000 | 0.386525000  | -2.254426000 |
| 1 | -7.401195000 | 2.440979000  | -2.144604000 |
| 1 | -8.203071000 | 2.872636000  | -0.631913000 |
| 1 | -7.973256000 | 0.406396000  | -0.839982000 |
| 1 | -6.862740000 | 0.003994000  | 1.343341000  |
| 1 | -7.886809000 | 1.440848000  | 1.417990000  |
| 6 | -3.370261000 | 0.640807000  | -1.339447000 |
| 8 | -2.570054000 | 1.257542000  | -2.023118000 |
| 1 | 1.712477000  | -2.687653000 | 1.276753000  |
| 8 | 0.832599000  | -3.190400000 | 1.258285000  |
| 6 | -1.498608000 | -3.208320000 | 1.698563000  |
| 6 | -1.683519000 | -3.931700000 | 0.360904000  |
| 6 | -3.029452000 | -4.652864000 | 0.362880000  |
| 1 | -0.874054000 | -4.649908000 | 0.220793000  |
| 1 | -1.639073000 | -3.211393000 | -0.455976000 |
| 6 | -2.633347000 | -2.205338000 | 1.915523000  |
| 6 | -3.970207000 | -2.942222000 | 1.913000000  |
| 1 | -2.620412000 | -1.466531000 | 1.113567000  |
| 1 | -2.491197000 | -1.685912000 | 2.866266000  |
| 6 | -4.156505000 | -3.641734000 | 0.567748000  |
| 1 | -4.138605000 | -2.902416000 | -0.234716000 |
| 1 | -5.123038000 | -4.150608000 | 0.542828000  |
| 6 | -1.514889000 | -4.245056000 | 2.835919000  |
| 6 | -3.051613000 | -5.684667000 | 1.490271000  |
| 1 | -3.164567000 | -5.159907000 | -0.598437000 |
| 6 | -3.989906000 | -3.971675000 | 3.041681000  |
| 1 | -4.780273000 | -2.219723000 | 2.066416000  |
| 6 | -2.857460000 | -4.975085000 | 2.829467000  |
| 1 | -1.366828000 | -3.743251000 | 3.795811000  |
| 1 | -0.698668000 | -4.956390000 | 2.693132000  |
| 1 | -2.256549000 | -6.418187000 | 1.338972000  |
| 1 | -4.004557000 | -6.218741000 | 1.490245000  |
| 1 | -2.864354000 | -5.712475000 | 3.640351000  |
| 1 | -3.869371000 | -3.470616000 | 4.005178000  |
| 1 | -4.949383000 | -4.493577000 | 3.053711000  |
| 6 | -0.158232000 | -2.506284000 | 1.746455000  |
| 8 | -0.019491000 | -1.396008000 | 2.250227000  |
| 1 | 1.413925000  | -0.549256000 | 2.345049000  |
| 8 | 2.290852000  | -0.057977000 | 2.377264000  |
| 6 | 4.556151000  | 0.038884000  | 1.681616000  |
| 6 | 4.362050000  | 1.194565000  | 0.688194000  |
| 6 | 5.660858000  | 1.987869000  | 0.571545000  |
| 1 | 3.556490000  | 1.840061000  | 1.042452000  |
| 1 | 4.074197000  | 0.795925000  | -0.286687000 |
| 6 | 5.675074000  | -0.875856000 | 1.181753000  |
| 6 | 6.970479000  | -0.075264000 | 1.066183000  |
| 1 | 5.400719000  | -1.293758000 | 0.211957000  |
| 1 | 5.805464000  | -1.709044000 | 1.875628000  |
| 6 | 6.777008000  | 1.070901000  | 0.074194000  |
| 1 | 6.520054000  | 0.672004000  | -0.909724000 |
| 1 | 7.705659000  | 1.637083000  | -0.026250000 |
| 6 | 4.931097000  | 0.613482000  | 3.052884000  |
| 6 | 6.034531000  | 2.557391000  | 1.939188000  |
| 1 | 5.515815000  | 2.808268000  | -0.140756000 |

|   |              |              |              |
|---|--------------|--------------|--------------|
| 6 | 7.347292000  | 0.491955000  | 2.434349000  |
| 1 | 7.770093000  | -0.734483000 | 0.710991000  |
| 6 | 6.229465000  | 1.409211000  | 2.928625000  |
| 1 | 4.126544000  | 1.256119000  | 3.414516000  |
| 1 | 5.060458000  | -0.201684000 | 3.769099000  |
| 1 | 5.244929000  | 3.224109000  | 2.293827000  |
| 1 | 6.954732000  | 3.140499000  | 1.860560000  |
| 1 | 6.495985000  | 1.814906000  | 3.910994000  |
| 1 | 8.281778000  | 1.052622000  | 2.360050000  |
| 1 | 7.501623000  | -0.322941000 | 3.145186000  |
| 6 | 3.242432000  | -0.714213000 | 1.766541000  |
| 8 | 3.088448000  | -1.829231000 | 1.296747000  |
| 1 | -0.845141000 | 0.182597000  | 1.858742000  |
| 8 | -0.875099000 | 1.125827000  | 1.580469000  |
| 6 | 0.198658000  | 2.790742000  | 0.259898000  |
| 6 | 1.105075000  | 2.930401000  | -0.963692000 |
| 6 | 1.346745000  | 4.409505000  | -1.251765000 |
| 1 | 0.633948000  | 2.449082000  | -1.822003000 |
| 1 | 2.050995000  | 2.419757000  | -0.777513000 |
| 6 | 0.862368000  | 3.454162000  | 1.477256000  |
| 6 | 1.111137000  | 4.930432000  | 1.175940000  |
| 1 | 1.804745000  | 2.950649000  | 1.704827000  |
| 1 | 0.210689000  | 3.350793000  | 2.347160000  |
| 6 | 2.020390000  | 5.061945000  | -0.045007000 |
| 1 | 2.980294000  | 4.577907000  | 0.151157000  |
| 1 | 2.213714000  | 6.117356000  | -0.250786000 |
| 6 | -1.139198000 | 3.484460000  | -0.012787000 |
| 6 | 0.011115000  | 5.097206000  | -1.530857000 |
| 1 | 1.997204000  | 4.505345000  | -2.128266000 |
| 6 | -0.222305000 | 5.622890000  | 0.898187000  |
| 1 | 1.592137000  | 5.397166000  | 2.043514000  |
| 6 | -0.892463000 | 4.963239000  | -0.306280000 |
| 1 | -1.788660000 | 3.378153000  | 0.858753000  |
| 1 | -1.623115000 | 3.011558000  | -0.868814000 |
| 1 | -0.468581000 | 4.635500000  | -2.396268000 |
| 1 | 0.174749000  | 6.153194000  | -1.758559000 |
| 1 | -1.852013000 | 5.454871000  | -0.504734000 |
| 1 | -0.870297000 | 5.546089000  | 1.774498000  |
| 1 | -0.055730000 | 6.683613000  | 0.696701000  |
| 6 | -0.003910000 | 1.325931000  | 0.596631000  |
| 8 | 0.586653000  | 0.415582000  | 0.066063000  |

---

**2aCL5**

|   |             |              |              |
|---|-------------|--------------|--------------|
| 1 | 1.415783000 | -0.931005000 | -1.414410000 |
| 6 | 1.318824000 | -3.448210000 | 0.699842000  |
| 6 | 2.112654000 | -3.017494000 | 1.947770000  |
| 6 | 2.505326000 | -4.248551000 | 2.756257000  |
| 6 | 1.242694000 | -4.987471000 | 3.193447000  |
| 6 | 0.454720000 | -5.417957000 | 1.957920000  |
| 1 | 0.627935000 | -4.335283000 | 3.817971000  |
| 1 | 1.509974000 | -5.865819000 | 3.785652000  |
| 6 | 0.048569000 | -4.197659000 | 1.128075000  |
| 1 | 1.496507000 | -2.346198000 | 2.550081000  |
| 1 | 3.002284000 | -2.469012000 | 1.634473000  |
| 6 | 1.306926000 | -6.346924000 | 1.090100000  |

|   |              |              |              |
|---|--------------|--------------|--------------|
| 1 | -0.451649000 | -5.948106000 | 2.273114000  |
| 6 | 3.366544000  | -5.165211000 | 1.891101000  |
| 1 | 3.072915000  | -3.933238000 | 3.638645000  |
| 6 | 2.167405000  | -4.376796000 | -0.175072000 |
| 6 | 2.570624000  | -5.596016000 | 0.660916000  |
| 1 | 3.190000000  | -6.257466000 | 0.043874000  |
| 1 | 4.272791000  | -4.639170000 | 1.581857000  |
| 1 | 3.667984000  | -6.045207000 | 2.464248000  |
| 6 | 0.965353000  | -2.142465000 | 0.018679000  |
| 6 | -0.738194000 | -4.637861000 | -0.106529000 |
| 1 | -0.571052000 | -3.533103000 | 1.740105000  |
| 6 | 0.512160000  | -6.796217000 | -0.134027000 |
| 1 | 1.593800000  | -7.226680000 | 1.678478000  |
| 6 | 1.380458000  | -4.836543000 | -1.403181000 |
| 1 | 3.066764000  | -3.842728000 | -0.498857000 |
| 6 | 0.118801000  | -5.572333000 | -0.958011000 |
| 1 | -0.382480000 | -7.337442000 | 0.183448000  |
| 1 | 1.116274000  | -7.474730000 | -0.740989000 |
| 1 | 2.005124000  | -5.501131000 | -2.004871000 |
| 1 | 1.115159000  | -3.979326000 | -2.022687000 |
| 1 | -1.027214000 | -3.765236000 | -0.697650000 |
| 1 | -1.651157000 | -5.150757000 | 0.206732000  |
| 1 | -0.451118000 | -5.888988000 | -1.838556000 |
| 8 | 1.657313000  | -1.841950000 | -1.033212000 |
| 8 | 0.109862000  | -1.399229000 | 0.493094000  |
| 1 | 1.603693000  | 0.427546000  | 1.845325000  |
| 6 | -0.314386000 | 2.271648000  | 3.746330000  |
| 6 | 0.520023000  | 2.332402000  | 5.040350000  |
| 6 | -0.379540000 | 2.708467000  | 6.213448000  |
| 6 | -1.007942000 | 4.074630000  | 5.949804000  |
| 6 | -1.838260000 | 4.011167000  | 4.669777000  |
| 1 | -0.225837000 | 4.830752000  | 5.848509000  |
| 1 | -1.644120000 | 4.360350000  | 6.790802000  |
| 6 | -0.957539000 | 3.637356000  | 3.475075000  |
| 1 | 1.315751000  | 3.072815000  | 4.924641000  |
| 1 | 0.982537000  | 1.358513000  | 5.218726000  |
| 6 | -2.946930000 | 2.964971000  | 4.815020000  |
| 1 | -2.289898000 | 4.992525000  | 4.483215000  |
| 6 | -1.475814000 | 1.656588000  | 6.363948000  |
| 1 | 0.222084000  | 2.749038000  | 7.128369000  |
| 6 | -1.423452000 | 1.222373000  | 3.887312000  |
| 6 | -2.303860000 | 1.601495000  | 5.081882000  |
| 1 | -3.091283000 | 0.846945000  | 5.192926000  |
| 1 | -1.029115000 | 0.679105000  | 6.560678000  |
| 1 | -2.119029000 | 1.908147000  | 7.210471000  |
| 6 | 0.687473000  | 1.911317000  | 2.666262000  |
| 6 | -1.802258000 | 3.578350000  | 2.203050000  |
| 1 | -0.165785000 | 4.383799000  | 3.348849000  |
| 6 | -3.793276000 | 2.909735000  | 3.545048000  |
| 1 | -3.585677000 | 3.234265000  | 5.664826000  |
| 6 | -2.266225000 | 1.169985000  | 2.613916000  |
| 1 | -0.970391000 | 0.241653000  | 4.062810000  |
| 6 | -2.904034000 | 2.533967000  | 2.362420000  |
| 1 | -4.260656000 | 3.881549000  | 3.368240000  |
| 1 | -4.590241000 | 2.171333000  | 3.662358000  |

|   |              |             |              |
|---|--------------|-------------|--------------|
| 1 | -3.038342000 | 0.405203000 | 2.722624000  |
| 1 | -1.642005000 | 0.896201000 | 1.763586000  |
| 1 | -1.168318000 | 3.317319000 | 1.354550000  |
| 1 | -2.240254000 | 4.560966000 | 2.009521000  |
| 1 | -3.505132000 | 2.494050000 | 1.447322000  |
| 8 | 0.916511000  | 0.628945000 | 2.551728000  |
| 8 | 1.293387000  | 2.753213000 | 2.022376000  |
| 1 | -0.165477000 | 0.129978000 | -0.022814000 |
| 6 | -0.043070000 | 2.669690000 | -2.073293000 |
| 6 | 0.829040000  | 3.650458000 | -1.267964000 |
| 6 | 0.611059000  | 5.070037000 | -1.779335000 |
| 6 | 1.006230000  | 5.139479000 | -3.252334000 |
| 6 | 0.142223000  | 4.167759000 | -4.053213000 |
| 1 | 2.061424000  | 4.880110000 | -3.367289000 |
| 1 | 0.867676000  | 6.155704000 | -3.629282000 |
| 6 | 0.340136000  | 2.732388000 | -3.557768000 |
| 1 | 1.880349000  | 3.375073000 | -1.377591000 |
| 1 | 0.573241000  | 3.590694000 | -0.208433000 |
| 6 | -1.335446000 | 4.543018000 | -3.910891000 |
| 1 | 0.426580000  | 4.218476000 | -5.110904000 |
| 6 | -0.860395000 | 5.444026000 | -1.620646000 |
| 1 | 1.231919000  | 5.758433000 | -1.195942000 |
| 6 | -1.525040000 | 3.041082000 | -1.931936000 |
| 6 | -1.719468000 | 4.475164000 | -2.430436000 |
| 1 | -2.775753000 | 4.747885000 | -2.318390000 |
| 1 | -1.142107000 | 5.398971000 | -0.566236000 |
| 1 | -1.025392000 | 6.466022000 | -1.970336000 |
| 6 | 0.241869000  | 1.301357000 | -1.488586000 |
| 6 | -0.528132000 | 1.777496000 | -4.377185000 |
| 1 | 1.391840000  | 2.445458000 | -3.665858000 |
| 6 | -2.205317000 | 3.588442000 | -4.725924000 |
| 1 | -1.482864000 | 5.567347000 | -4.274238000 |
| 6 | -2.385638000 | 2.077929000 | -2.749158000 |
| 1 | -1.812810000 | 2.978675000 | -0.877451000 |
| 6 | -1.997179000 | 2.161600000 | -4.223290000 |
| 1 | -1.937897000 | 3.654142000 | -5.783398000 |
| 1 | -3.256782000 | 3.870562000 | -4.628426000 |
| 1 | -3.440299000 | 2.342146000 | -2.628454000 |
| 1 | -2.244359000 | 1.056620000 | -2.389353000 |
| 1 | -0.374841000 | 0.752127000 | -4.038949000 |
| 1 | -0.235057000 | 1.831757000 | -5.428547000 |
| 1 | -2.618535000 | 1.471327000 | -4.804703000 |
| 8 | -0.356546000 | 1.065066000 | -0.351333000 |
| 8 | 1.027347000  | 0.515536000 | -1.995209000 |
| 1 | 2.615158000  | 2.552981000 | 1.061018000  |
| 6 | 4.672884000  | 0.733868000 | -0.712969000 |
| 6 | 4.179250000  | 1.187142000 | -2.099943000 |
| 6 | 5.240788000  | 0.881235000 | -3.149924000 |
| 6 | 6.519289000  | 1.641266000 | -2.805851000 |
| 6 | 7.013356000  | 1.198550000 | -1.430527000 |
| 1 | 6.324647000  | 2.716441000 | -2.803296000 |
| 1 | 7.287770000  | 1.441342000 | -3.556303000 |
| 6 | 5.961062000  | 1.490511000 | -0.356445000 |
| 1 | 3.983003000  | 2.262019000 | -2.072026000 |
| 1 | 3.247582000  | 0.675365000 | -2.345926000 |

|   |              |              |              |
|---|--------------|--------------|--------------|
| 6 | 7.309732000  | -0.303140000 | -1.442746000 |
| 1 | 7.930522000  | 1.745731000  | -1.181971000 |
| 6 | 5.516082000  | -0.619992000 | -3.165785000 |
| 1 | 4.874770000  | 1.199315000  | -4.132204000 |
| 6 | 4.971161000  | -0.770538000 | -0.718216000 |
| 6 | 6.022908000  | -1.056091000 | -1.793143000 |
| 1 | 6.228789000  | -2.132853000 | -1.809479000 |
| 1 | 4.599557000  | -1.160920000 | -3.410333000 |
| 1 | 6.262269000  | -0.854900000 | -3.928560000 |
| 6 | 3.544577000  | 1.071670000  | 0.240973000  |
| 6 | 6.476075000  | 1.042814000  | 1.011358000  |
| 1 | 5.749696000  | 2.564639000  | -0.331822000 |
| 6 | 7.832071000  | -0.745641000 | -0.077849000 |
| 1 | 8.068611000  | -0.513388000 | -2.205820000 |
| 6 | 5.497205000  | -1.218635000 | 0.646152000  |
| 1 | 4.049589000  | -1.313693000 | -0.949793000 |
| 6 | 6.774875000  | -0.455037000 | 0.984570000  |
| 1 | 8.755747000  | -0.211188000 | 0.157284000  |
| 1 | 8.058632000  | -1.814477000 | -0.094746000 |
| 1 | 5.701214000  | -2.292401000 | 0.622360000  |
| 1 | 4.744522000  | -1.036718000 | 1.414826000  |
| 1 | 5.730138000  | 1.260737000  | 1.779862000  |
| 1 | 7.382841000  | 1.599431000  | 1.260417000  |
| 1 | 7.142906000  | -0.772631000 | 1.966901000  |
| 8 | 3.416345000  | 2.351925000  | 0.482245000  |
| 8 | 2.784033000  | 0.236593000  | 0.704901000  |
| 1 | -1.605784000 | -1.583792000 | 0.776272000  |
| 6 | -4.387348000 | -1.251066000 | -0.848381000 |
| 6 | -4.811535000 | 0.107709000  | -0.263377000 |
| 6 | -6.307776000 | 0.314546000  | -0.472555000 |
| 6 | -6.620059000 | 0.279504000  | -1.966485000 |
| 6 | -6.206966000 | -1.074641000 | -2.538803000 |
| 1 | -6.078334000 | 1.078177000  | -2.478762000 |
| 1 | -7.688616000 | 0.440836000  | -2.128275000 |
| 6 | -4.705824000 | -1.303159000 | -2.347706000 |
| 1 | -4.247321000 | 0.905333000  | -0.751219000 |
| 1 | -4.575547000 | 0.127774000  | 0.802370000  |
| 6 | -6.972389000 | -2.198906000 | -1.835473000 |
| 1 | -6.435744000 | -1.098421000 | -3.610742000 |
| 6 | -7.071422000 | -0.799323000 | 0.239595000  |
| 1 | -6.598953000 | 1.285813000  | -0.056505000 |
| 6 | -5.151967000 | -2.378145000 | -0.142532000 |
| 6 | -6.653343000 | -2.149430000 | -0.339179000 |
| 1 | -7.202871000 | -2.948014000 | 0.173412000  |
| 1 | -6.856633000 | -0.771146000 | 1.310536000  |
| 1 | -8.146923000 | -0.657657000 | 0.108954000  |
| 6 | -2.891308000 | -1.336078000 | -0.602693000 |
| 6 | -4.309211000 | -2.658978000 | -2.931457000 |
| 1 | -4.142684000 | -0.515262000 | -2.858104000 |
| 6 | -6.574112000 | -3.555148000 | -2.413753000 |
| 1 | -8.048963000 | -2.046394000 | -1.979177000 |
| 6 | -4.748605000 | -3.732092000 | -0.725023000 |
| 1 | -4.914430000 | -2.356717000 | 0.926019000  |
| 6 | -5.074905000 | -3.769277000 | -2.216486000 |
| 1 | -6.818451000 | -3.590910000 | -3.478139000 |

|   |              |              |              |
|---|--------------|--------------|--------------|
| 1 | -7.134511000 | -4.349612000 | -1.914552000 |
| 1 | -5.285884000 | -4.529513000 | -0.205264000 |
| 1 | -3.679526000 | -3.894730000 | -0.574756000 |
| 1 | -3.234292000 | -2.806955000 | -2.820000000 |
| 1 | -4.538950000 | -2.676141000 | -3.999598000 |
| 1 | -4.784598000 | -4.741487000 | -2.630659000 |
| 8 | -2.584514000 | -1.620159000 | 0.656160000  |
| 8 | -2.047720000 | -1.108096000 | -1.437742000 |

---

**4aCL4**

|   |              |              |              |
|---|--------------|--------------|--------------|
| 1 | 8.756752000  | -2.659283000 | -0.412816000 |
| 6 | 5.699476000  | -3.337136000 | 0.426099000  |
| 6 | 5.099642000  | -2.741969000 | -0.854892000 |
| 6 | 3.656271000  | -3.212733000 | -1.007085000 |
| 6 | 3.602643000  | -4.738812000 | -1.103684000 |
| 6 | 4.216673000  | -5.331879000 | 0.167067000  |
| 1 | 4.183953000  | -5.065654000 | -1.973119000 |
| 6 | 2.157225000  | -5.206602000 | -1.269093000 |
| 6 | 5.664555000  | -4.866285000 | 0.324231000  |
| 1 | 5.692690000  | -3.056150000 | -1.715523000 |
| 1 | 5.126005000  | -1.650530000 | -0.804761000 |
| 6 | 3.379837000  | -4.888143000 | 1.370291000  |
| 1 | 4.201826000  | -6.425656000 | 0.099622000  |
| 6 | 2.827406000  | -2.763609000 | 0.197986000  |
| 1 | 3.233688000  | -2.777204000 | -1.919965000 |
| 6 | 4.874049000  | -2.891761000 | 1.633638000  |
| 6 | 3.432621000  | -3.361852000 | 1.469660000  |
| 1 | 2.847414000  | -3.035546000 | 2.336783000  |
| 1 | 2.848261000  | -1.669381000 | 0.266006000  |
| 6 | 1.381283000  | -3.220250000 | 0.037948000  |
| 6 | 7.131179000  | -2.846595000 | 0.572987000  |
| 1 | 6.100006000  | -5.304002000 | 1.225558000  |
| 1 | 6.259948000  | -5.188635000 | -0.532041000 |
| 1 | 3.799847000  | -5.323471000 | 2.283770000  |
| 6 | 1.934607000  | -5.357266000 | 1.214787000  |
| 1 | 5.309031000  | -3.306007000 | 2.544854000  |
| 1 | 4.908832000  | -1.803525000 | 1.721773000  |
| 8 | 7.887570000  | -3.117628000 | -0.483145000 |
| 6 | 1.338714000  | -4.756497000 | -0.058082000 |
| 1 | 1.340734000  | -5.050717000 | 2.077691000  |
| 1 | 1.896762000  | -6.447242000 | 1.157258000  |
| 1 | 0.948038000  | -2.786807000 | -0.866460000 |
| 1 | 0.787817000  | -2.890395000 | 0.894446000  |
| 1 | 2.124664000  | -6.295521000 | -1.349129000 |
| 1 | 1.729274000  | -4.788667000 | -2.181500000 |
| 8 | 7.539353000  | -2.237005000 | 1.531578000  |
| 1 | -1.603367000 | -5.003838000 | -1.436919000 |
| 8 | -0.602781000 | -4.929354000 | -1.406381000 |
| 6 | -0.132235000 | -5.096570000 | -0.194751000 |
| 8 | -0.828625000 | -5.416657000 | 0.752401000  |
| 1 | 2.284450000  | 4.825804000  | -1.492090000 |
| 6 | 5.105984000  | 3.632658000  | -0.364979000 |
| 6 | 5.805186000  | 3.587440000  | -1.723346000 |
| 6 | 7.024440000  | 2.670758000  | -1.633500000 |
| 6 | 8.009353000  | 3.185358000  | -0.580340000 |

---



|   |              |              |              |
|---|--------------|--------------|--------------|
| 6 | 7.294144000  | 3.246112000  | 0.772296000  |
| 1 | 8.343143000  | 4.191550000  | -0.858489000 |
| 6 | 9.230471000  | 2.267095000  | -0.497827000 |
| 6 | 6.075784000  | 4.164135000  | 0.691103000  |
| 1 | 6.114679000  | 4.594839000  | -2.010177000 |
| 1 | 5.116130000  | 3.218922000  | -2.484574000 |
| 6 | 6.864569000  | 1.830009000  | 1.160793000  |
| 1 | 7.983561000  | 3.635609000  | 1.529498000  |
| 6 | 6.591469000  | 1.254687000  | -1.247880000 |
| 1 | 7.520336000  | 2.642749000  | -2.610455000 |
| 6 | 4.662386000  | 2.210425000  | 0.026916000  |
| 6 | 5.886663000  | 1.305129000  | 0.108934000  |
| 1 | 5.567396000  | 0.295617000  | 0.392646000  |
| 1 | 5.896801000  | 0.870366000  | -2.003938000 |
| 6 | 7.803113000  | 0.332449000  | -1.171945000 |
| 6 | 3.822507000  | 4.440013000  | -0.393738000 |
| 1 | 5.572304000  | 4.213974000  | 1.658061000  |
| 1 | 6.386368000  | 5.177011000  | 0.425037000  |
| 1 | 6.366877000  | 1.855631000  | 2.136394000  |
| 6 | 8.079673000  | 0.912416000  | 1.254768000  |
| 1 | 4.151719000  | 2.240765000  | 0.992511000  |
| 1 | 3.961792000  | 1.827881000  | -0.719695000 |
| 8 | 3.198962000  | 4.411225000  | -1.544690000 |
| 6 | 8.778733000  | 0.853904000  | -0.115861000 |
| 1 | 7.774298000  | -0.090232000 | 1.558489000  |
| 1 | 8.779167000  | 1.295554000  | 2.000601000  |
| 1 | 8.302851000  | 0.285287000  | -2.142348000 |
| 1 | 7.482484000  | -0.675570000 | -0.914620000 |
| 1 | 9.932016000  | 2.646184000  | 0.246620000  |
| 1 | 9.741168000  | 2.243480000  | -1.463638000 |
| 8 | 3.374073000  | 4.994433000  | 0.594571000  |
| 1 | 11.687408000 | -0.214906000 | 0.787695000  |
| 8 | 10.990080000 | 0.447489000  | 0.654931000  |
| 6 | 9.941809000  | -0.098472000 | 0.041511000  |
| 8 | 9.948457000  | -1.257841000 | -0.304404000 |
| 1 | 1.766647000  | 5.268883000  | 0.937247000  |
| 6 | -1.330813000 | 4.772376000  | 0.041393000  |
| 6 | -1.983034000 | 5.441675000  | 1.251459000  |
| 6 | -3.433209000 | 4.972531000  | 1.367182000  |
| 6 | -4.218487000 | 5.340208000  | 0.105015000  |
| 6 | -3.546866000 | 4.678527000  | -1.101156000 |
| 1 | -4.205058000 | 6.428259000  | -0.025659000 |
| 6 | -5.669996000 | 4.875011000  | 0.226498000  |
| 6 | -2.098550000 | 5.146113000  | -1.226760000 |
| 1 | -1.950198000 | 6.526971000  | 1.132038000  |
| 1 | -1.432690000 | 5.186098000  | 2.158099000  |
| 6 | -3.598079000 | 3.160441000  | -0.918192000 |
| 1 | -4.090427000 | 4.950621000  | -2.012712000 |
| 6 | -3.484154000 | 3.454154000  | 1.553017000  |
| 1 | -3.894991000 | 5.457153000  | 2.234635000  |
| 6 | -1.371043000 | 3.243938000  | 0.225794000  |
| 6 | -2.821097000 | 2.787409000  | 0.345987000  |
| 1 | -2.840371000 | 1.698880000  | 0.476527000  |
| 1 | -2.936158000 | 3.182511000  | 2.462278000  |
| 6 | -4.929375000 | 2.984349000  | 1.681164000  |

|   |               |              |              |
|---|---------------|--------------|--------------|
| 6 | 0.142102000   | 5.105803000  | -0.089100000 |
| 1 | -1.622854000  | 4.682650000  | -2.092912000 |
| 1 | -2.064227000  | 6.228372000  | -1.369275000 |
| 1 | -3.134320000  | 2.675483000  | -1.785020000 |
| 6 | -5.044760000  | 2.689947000  | -0.801658000 |
| 1 | -0.895122000  | 2.759547000  | -0.630707000 |
| 1 | -0.815971000  | 2.970648000  | 1.126167000  |
| 8 | 0.771484000   | 5.201557000  | 1.055582000  |
| 6 | -5.702987000  | 3.354681000  | 0.415585000  |
| 1 | -5.068993000  | 1.603179000  | -0.689060000 |
| 1 | -5.600852000  | 2.950268000  | -1.704063000 |
| 1 | -5.405178000  | 3.447191000  | 2.547581000  |
| 1 | -4.963776000  | 1.902818000  | 1.829684000  |
| 1 | -6.228935000  | 5.143572000  | -0.671723000 |
| 1 | -6.145923000  | 5.361459000  | 1.081196000  |
| 8 | 0.703264000   | 5.192560000  | -1.167668000 |
| 1 | -8.726707000  | 2.649124000  | -0.516212000 |
| 8 | -7.859267000  | 3.114432000  | -0.559850000 |
| 6 | -7.134950000  | 2.854457000  | 0.521072000  |
| 8 | -7.566831000  | 2.242440000  | 1.467729000  |
| 1 | -11.730287000 | 0.221784000  | 0.544142000  |
| 6 | -8.778027000  | -0.858131000 | -0.189320000 |
| 6 | -9.213446000  | -2.272182000 | -0.586456000 |
| 6 | -7.992587000  | -3.194284000 | -0.599568000 |
| 6 | -6.951433000  | -2.687955000 | -1.601426000 |
| 6 | -6.534577000  | -1.271426000 | -1.200382000 |
| 1 | -7.394209000  | -2.663846000 | -2.603567000 |
| 6 | -5.734396000  | -3.609580000 | -1.617814000 |
| 6 | -7.745672000  | -0.345417000 | -1.194529000 |
| 1 | -9.672389000  | -2.252717000 | -1.577963000 |
| 1 | -9.954524000  | -2.644953000 | 0.122040000  |
| 6 | -5.903414000  | -1.316728000 | 0.192551000  |
| 1 | -5.799247000  | -0.893336000 | -1.920237000 |
| 6 | -7.350840000  | -3.249891000 | 0.789598000  |
| 1 | -8.314123000  | -4.200896000 | -0.890288000 |
| 6 | -8.152492000  | -0.909716000 | 1.216711000  |
| 6 | -6.938099000  | -1.832858000 | 1.193075000  |
| 1 | -6.493491000  | -1.854512000 | 2.194082000  |
| 1 | -8.081329000  | -3.633121000 | 1.510793000  |
| 6 | -6.132115000  | -4.172867000 | 0.782074000  |
| 6 | -9.944721000  | 0.098405000  | -0.099450000 |
| 1 | -7.435958000  | 0.662720000  | -0.925303000 |
| 1 | -8.192404000  | -0.302085000 | -2.190615000 |
| 1 | -5.597137000  | -0.306720000 | 0.488340000  |
| 6 | -4.680024000  | -2.226765000 | 0.183336000  |
| 1 | -7.857746000  | 0.093971000  | 1.527795000  |
| 1 | -8.891940000  | -1.283983000 | 1.927734000  |
| 8 | -11.028557000 | -0.443052000 | 0.453286000  |
| 6 | -5.106467000  | -3.648492000 | -0.224953000 |
| 1 | -4.223628000  | -2.255123000 | 1.175129000  |
| 1 | -3.937602000  | -1.849316000 | -0.525072000 |
| 1 | -6.433283000  | -5.185649000 | 0.504400000  |
| 1 | -5.685609000  | -4.213667000 | 1.776716000  |
| 1 | -4.999451000  | -3.253834000 | -2.342162000 |
| 1 | -6.028346000  | -4.618505000 | -1.914690000 |

|   |              |              |              |
|---|--------------|--------------|--------------|
| 8 | -9.927439000 | 1.257641000  | -0.445566000 |
| 1 | -2.460890000 | -5.147782000 | 0.949011000  |
| 8 | -3.382150000 | -4.748394000 | 0.973780000  |
| 6 | -3.829872000 | -4.467018000 | -0.224926000 |
| 8 | -3.238773000 | -4.769351000 | -1.246270000 |

---

**Table S6.** Geometries of alcohols **1b–4b** and clusters **1bCL7**, **2bCL4**, **3bCL7**, and **4bCL8** in Cartesian coordinates in Å computed using the GFN2-xTB method at 0.4 K.

| <b>1b</b> |              |              |              |
|-----------|--------------|--------------|--------------|
| 6         | -2.925751000 | -1.033629000 | -3.101307000 |
| 6         | -2.419229000 | -1.598784000 | -4.430571000 |
| 6         | -3.439163000 | -1.307889000 | -5.544216000 |
| 1         | -2.258735000 | -2.674712000 | -4.321805000 |
| 1         | -1.451090000 | -1.147159000 | -4.662883000 |
| 6         | -3.120233000 | 0.483301000  | -3.238014000 |
| 6         | -4.145824000 | 0.783843000  | -4.345007000 |
| 1         | -2.156080000 | 0.945518000  | -3.466056000 |
| 1         | -3.462651000 | 0.896956000  | -2.282232000 |
| 6         | -3.632001000 | 0.211935000  | -5.676815000 |
| 1         | -2.685592000 | 0.688974000  | -5.949076000 |
| 1         | -4.344733000 | 0.431175000  | -6.477662000 |
| 6         | -4.270505000 | -1.688762000 | -2.753212000 |
| 6         | -4.785004000 | -1.963235000 | -5.190835000 |
| 1         | -3.067951000 | -1.715232000 | -6.488456000 |
| 6         | -5.488855000 | 0.125113000  | -3.988484000 |
| 1         | -4.278202000 | 1.865579000  | -4.434675000 |
| 6         | -5.300134000 | -1.395243000 | -3.858299000 |
| 1         | -4.629087000 | -1.303278000 | -1.791555000 |
| 1         | -4.121728000 | -2.765709000 | -2.636478000 |
| 1         | -4.665961000 | -3.048375000 | -5.115322000 |
| 1         | -5.514058000 | -1.774651000 | -5.984926000 |
| 1         | -6.253796000 | -1.864733000 | -3.601621000 |
| 1         | -5.872446000 | 0.537604000  | -3.049856000 |
| 1         | -6.231346000 | 0.345941000  | -4.761404000 |
| 8         | -1.929753000 | -1.342183000 | -2.121258000 |
| 1         | -2.218584000 | -0.997911000 | -1.270075000 |

---

| <b>2b</b> |             |              |              |
|-----------|-------------|--------------|--------------|
| 6         | 2.052403000 | 0.347313000  | 1.522554000  |
| 6         | 2.551697000 | -0.280669000 | 0.217447000  |
| 6         | 4.084295000 | -0.341933000 | 0.200261000  |
| 6         | 4.644376000 | 1.080810000  | 0.330690000  |
| 6         | 4.157439000 | 1.707798000  | 1.641854000  |
| 1         | 4.322617000 | 1.691890000  | -0.518941000 |
| 1         | 5.738516000 | 1.058292000  | 0.311392000  |
| 6         | 2.613590000 | 1.780070000  | 1.675884000  |
| 1         | 2.187580000 | 0.312940000  | -0.630074000 |
| 1         | 2.120585000 | -1.281100000 | 0.121263000  |
| 6         | 4.630734000 | 0.870402000  | 2.849042000  |
| 1         | 4.556793000 | 2.723575000  | 1.732838000  |
| 6         | 4.557584000 | -1.189428000 | 1.389445000  |
| 1         | 4.424680000 | -0.791817000 | -0.736568000 |

|   |             |              |             |
|---|-------------|--------------|-------------|
| 6 | 2.524108000 | -0.485281000 | 2.730202000 |
| 6 | 4.067400000 | -0.558478000 | 2.697453000 |
| 1 | 4.402934000 | -1.165724000 | 3.544608000 |
| 1 | 4.174494000 | -2.210708000 | 1.298800000 |
| 1 | 5.650174000 | -1.256516000 | 1.393285000 |
| 8 | 0.618425000 | 0.341804000  | 1.549967000 |
| 6 | 2.136314000 | 2.413057000  | 2.989599000 |
| 1 | 2.264674000 | 2.380257000  | 0.825919000 |
| 6 | 4.152108000 | 1.501013000  | 4.161920000 |
| 1 | 5.725088000 | 0.824027000  | 2.841364000 |
| 6 | 2.048548000 | 0.145838000  | 4.046078000 |
| 1 | 2.106006000 | -1.491673000 | 2.629707000 |
| 6 | 2.618747000 | 1.565637000  | 4.176242000 |
| 1 | 4.573779000 | 2.505942000  | 4.268849000 |
| 1 | 4.512597000 | 0.911462000  | 5.011245000 |
| 1 | 2.383363000 | -0.472318000 | 4.885315000 |
| 1 | 0.958110000 | 0.169427000  | 4.073499000 |
| 1 | 1.046935000 | 2.483575000  | 2.995912000 |
| 1 | 2.529883000 | 3.431606000  | 3.068249000 |
| 1 | 2.276364000 | 2.015775000  | 5.112334000 |
| 1 | 0.297537000 | 0.814471000  | 0.775532000 |

---

**3b**

|   |              |              |              |
|---|--------------|--------------|--------------|
| 6 | -6.998842000 | -4.405294000 | 1.644707000  |
| 6 | -7.568670000 | -3.832092000 | 0.339294000  |
| 6 | -6.916350000 | -2.476308000 | 0.038813000  |
| 6 | -7.189641000 | -1.478193000 | 1.184134000  |
| 6 | -6.630805000 | -2.070959000 | 2.495412000  |
| 1 | -8.270919000 | -1.339727000 | 1.286785000  |
| 6 | -6.535676000 | -0.124349000 | 0.883763000  |
| 6 | -7.284946000 | -3.426456000 | 2.792951000  |
| 1 | -8.653646000 | -3.712905000 | 0.422958000  |
| 1 | -7.385947000 | -4.525742000 | -0.487762000 |
| 6 | -5.103140000 | -2.229920000 | 2.342951000  |
| 1 | -6.836683000 | -1.376360000 | 3.316586000  |
| 6 | -5.388412000 | -2.634717000 | -0.111422000 |
| 1 | -7.327124000 | -2.071771000 | -0.892366000 |
| 6 | -5.480459000 | -4.582257000 | 1.498377000  |
| 6 | -4.825960000 | -3.227515000 | 1.198147000  |
| 1 | -3.743438000 | -3.360206000 | 1.094287000  |
| 1 | -5.179149000 | -3.324642000 | -0.935607000 |
| 6 | -4.739106000 | -1.276469000 | -0.406986000 |
| 1 | -7.464290000 | -5.371647000 | 1.858581000  |
| 1 | -6.899712000 | -3.829393000 | 3.735220000  |
| 1 | -8.365053000 | -3.299077000 | 2.917976000  |
| 1 | -4.688782000 | -2.629613000 | 3.274553000  |
| 6 | -4.456457000 | -0.871847000 | 2.041288000  |
| 1 | -5.060776000 | -5.003642000 | 2.417515000  |
| 1 | -5.259778000 | -5.289625000 | 0.692544000  |
| 6 | -5.024175000 | -0.297021000 | 0.738254000  |
| 1 | -3.369716000 | -0.984281000 | 1.948879000  |
| 1 | -4.642680000 | -0.164871000 | 2.854521000  |
| 1 | -5.124589000 | -0.856740000 | -1.340349000 |
| 1 | -3.655604000 | -1.395996000 | -0.525868000 |
| 1 | -6.737856000 | 0.589935000  | 1.686598000  |

|   |              |             |              |
|---|--------------|-------------|--------------|
| 1 | -6.936202000 | 0.303020000 | -0.039641000 |
| 8 | -4.487362000 | 1.000383000 | 0.463277000  |
| 1 | -3.533625000 | 0.923259000 | 0.359197000  |

---

**4b**

|   |             |              |             |
|---|-------------|--------------|-------------|
| 6 | 7.153208000 | -0.535181000 | 1.470931000 |
| 6 | 7.810822000 | 0.201583000  | 2.644080000 |
| 6 | 7.433265000 | -0.474943000 | 3.968117000 |
| 6 | 5.902981000 | -0.460857000 | 4.168646000 |
| 6 | 5.248376000 | -1.189044000 | 2.975891000 |
| 1 | 5.554382000 | 0.576776000  | 4.189995000 |
| 6 | 5.526415000 | -1.145098000 | 5.487716000 |
| 6 | 5.630959000 | -0.509545000 | 1.654757000 |
| 1 | 7.483730000 | 1.247844000  | 2.650250000 |
| 1 | 8.895222000 | 0.200145000  | 2.504186000 |
| 6 | 5.726356000 | -2.656391000 | 2.980353000 |
| 1 | 4.160459000 | -1.165575000 | 3.094767000 |
| 6 | 7.911245000 | -1.942284000 | 3.972587000 |
| 1 | 7.907964000 | 0.059028000  | 4.797450000 |
| 6 | 7.633180000 | -1.986244000 | 1.460734000 |
| 6 | 7.256641000 | -2.670473000 | 2.779831000 |
| 1 | 7.605250000 | -3.708103000 | 2.758480000 |
| 1 | 8.999160000 | -1.965771000 | 3.853704000 |
| 6 | 7.528648000 | -2.621790000 | 5.293710000 |
| 8 | 7.537820000 | 0.031084000  | 0.215287000 |
| 1 | 5.159556000 | -1.015446000 | 0.807914000 |
| 1 | 5.279470000 | 0.528748000  | 1.651274000 |
| 1 | 5.251677000 | -3.190344000 | 2.150997000 |
| 6 | 5.348773000 | -3.332925000 | 4.304377000 |
| 1 | 7.181656000 | -2.505806000 | 0.611384000 |
| 1 | 8.716272000 | -2.002362000 | 1.312462000 |
| 6 | 6.006385000 | -2.596167000 | 5.477525000 |
| 1 | 5.675849000 | -4.379194000 | 4.298191000 |
| 1 | 4.264368000 | -3.331454000 | 4.444257000 |
| 1 | 7.999975000 | -2.115866000 | 6.140581000 |
| 1 | 7.880162000 | -3.660069000 | 5.297232000 |
| 1 | 4.443319000 | -1.128987000 | 5.635968000 |
| 1 | 5.977904000 | -0.625572000 | 6.337108000 |
| 1 | 7.250697000 | 0.949437000  | 0.190251000 |
| 8 | 5.621803000 | -3.162395000 | 6.733186000 |
| 1 | 5.907893000 | -4.081081000 | 6.757789000 |

---

**1bCL7**

|   |              |              |              |
|---|--------------|--------------|--------------|
| 6 | -4.379107000 | -0.986743000 | 0.963356000  |
| 6 | -4.414829000 | -2.252101000 | 1.823489000  |
| 6 | -5.565660000 | -3.147619000 | 1.370601000  |
| 1 | -4.538647000 | -1.968838000 | 2.870587000  |
| 1 | -3.463595000 | -2.779510000 | 1.732036000  |
| 6 | -4.195436000 | -1.369130000 | -0.507150000 |
| 6 | -5.344768000 | -2.269308000 | -0.954157000 |
| 1 | -3.242605000 | -1.886399000 | -0.628201000 |
| 1 | -4.163934000 | -0.458641000 | -1.109826000 |
| 6 | -5.366986000 | -3.533269000 | -0.094969000 |
| 1 | -4.427405000 | -4.078094000 | -0.211291000 |
| 1 | -6.177833000 | -4.189575000 | -0.419374000 |

|   |              |              |              |
|---|--------------|--------------|--------------|
| 6 | -5.707918000 | -0.237092000 | 1.114980000  |
| 6 | -6.888523000 | -2.398951000 | 1.527878000  |
| 1 | -5.582733000 | -4.053263000 | 1.987652000  |
| 6 | -6.667828000 | -1.520947000 | -0.797535000 |
| 1 | -5.201743000 | -2.544343000 | -2.005481000 |
| 6 | -6.860057000 | -1.135409000 | 0.668833000  |
| 1 | -5.678676000 | 0.668730000  | 0.505955000  |
| 1 | -5.837646000 | 0.059742000  | 2.158342000  |
| 1 | -7.042682000 | -2.133044000 | 2.576118000  |
| 1 | -7.717841000 | -3.039577000 | 1.219139000  |
| 1 | -7.806315000 | -0.594084000 | 0.783736000  |
| 1 | -6.661993000 | -0.623670000 | -1.420395000 |
| 1 | -7.495596000 | -2.153116000 | -1.127118000 |
| 8 | -3.296824000 | -0.184260000 | 1.412318000  |
| 1 | -3.155197000 | 0.529929000  | 0.751318000  |
| 6 | -2.914205000 | 3.073121000  | -0.309055000 |
| 6 | -4.332096000 | 3.365190000  | 0.186221000  |
| 6 | -4.492082000 | 4.864133000  | 0.431125000  |
| 1 | -4.510881000 | 2.808465000  | 1.108318000  |
| 1 | -5.050074000 | 3.022024000  | -0.561768000 |
| 6 | -2.660507000 | 3.844166000  | -1.608146000 |
| 6 | -2.825178000 | 5.342082000  | -1.361257000 |
| 1 | -3.367333000 | 3.505167000  | -2.369455000 |
| 1 | -1.650770000 | 3.622432000  | -1.961504000 |
| 6 | -4.244534000 | 5.625935000  | -0.870507000 |
| 1 | -4.969223000 | 5.315703000  | -1.626714000 |
| 1 | -4.372692000 | 6.697839000  | -0.703718000 |
| 6 | -1.908588000 | 3.533658000  | 0.751093000  |
| 6 | -3.486278000 | 5.318707000  | 1.488260000  |
| 1 | -5.509768000 | 5.064821000  | 0.784440000  |
| 6 | -1.819365000 | 5.797763000  | -0.305245000 |
| 1 | -2.645511000 | 5.885946000  | -2.295757000 |
| 6 | -2.068171000 | 5.033160000  | 0.994476000  |
| 1 | -0.897071000 | 3.302059000  | 0.409221000  |
| 1 | -2.085083000 | 2.982741000  | 1.677853000  |
| 1 | -3.667430000 | 4.788634000  | 2.425978000  |
| 1 | -3.605141000 | 6.387641000  | 1.678946000  |
| 1 | -1.347382000 | 5.356625000  | 1.754981000  |
| 1 | -0.803092000 | 5.615562000  | -0.659916000 |
| 1 | -1.924286000 | 6.870851000  | -0.129590000 |
| 8 | -2.811925000 | 1.676051000  | -0.532559000 |
| 1 | -1.922202000 | 1.487538000  | -0.896854000 |
| 6 | 2.781689000  | 3.006402000  | -0.543264000 |
| 6 | 2.541834000  | 3.066508000  | 0.965364000  |
| 6 | 2.950142000  | 4.437181000  | 1.500045000  |
| 1 | 1.483936000  | 2.882207000  | 1.164284000  |
| 1 | 3.116126000  | 2.277586000  | 1.456555000  |
| 6 | 1.949202000  | 4.092256000  | -1.230429000 |
| 6 | 2.347319000  | 5.464860000  | -0.691074000 |
| 1 | 2.115114000  | 4.044715000  | -2.308575000 |
| 1 | 0.890254000  | 3.900530000  | -1.047665000 |
| 6 | 2.110100000  | 5.516207000  | 0.818062000  |
| 1 | 1.052721000  | 5.354487000  | 1.036330000  |
| 1 | 2.384622000  | 6.501149000  | 1.202154000  |
| 6 | 4.264559000  | 3.265907000  | -0.838068000 |

|   |              |              |              |
|---|--------------|--------------|--------------|
| 6 | 4.430625000  | 4.680689000  | 1.209654000  |
| 1 | 2.779700000  | 4.469146000  | 2.582124000  |
| 6 | 3.826258000  | 5.718047000  | -0.980645000 |
| 1 | 1.742574000  | 6.235455000  | -1.183074000 |
| 6 | 4.665577000  | 4.637574000  | -0.300157000 |
| 1 | 4.429414000  | 3.213654000  | -1.916793000 |
| 1 | 4.872822000  | 2.488789000  | -0.370041000 |
| 1 | 5.036435000  | 3.917062000  | 1.703058000  |
| 1 | 4.731835000  | 5.653659000  | 1.604071000  |
| 1 | 5.727046000  | 4.812439000  | -0.510339000 |
| 1 | 4.003214000  | 5.702922000  | -2.058480000 |
| 1 | 4.114960000  | 6.703134000  | -0.607480000 |
| 8 | 2.379456000  | 1.749290000  | -1.066695000 |
| 1 | 2.640184000  | 1.034457000  | -0.445431000 |
| 6 | -0.216904000 | 0.671237000  | -2.902162000 |
| 6 | 0.141706000  | 1.699416000  | -3.982529000 |
| 6 | 0.176626000  | 1.018557000  | -5.349054000 |
| 1 | 1.116111000  | 2.134200000  | -3.748481000 |
| 1 | -0.598220000 | 2.503523000  | -3.979847000 |
| 6 | -1.585628000 | 0.064710000  | -3.213979000 |
| 6 | -1.547616000 | -0.612628000 | -4.582399000 |
| 1 | -2.343139000 | 0.850322000  | -3.201628000 |
| 1 | -1.839170000 | -0.656835000 | -2.435875000 |
| 6 | -1.195455000 | 0.418223000  | -5.654468000 |
| 1 | -1.950647000 | 1.207354000  | -5.673720000 |
| 1 | -1.182595000 | -0.057224000 | -6.638083000 |
| 6 | 0.841699000  | -0.434101000 | -2.902521000 |
| 6 | 1.229191000  | -0.089391000 | -5.341361000 |
| 1 | 0.430387000  | 1.758494000  | -6.117305000 |
| 6 | -0.495628000 | -1.720624000 | -4.578470000 |
| 1 | -2.531997000 | -1.043728000 | -4.798627000 |
| 6 | 0.873473000  | -1.117592000 | -4.267885000 |
| 1 | 0.613858000  | -1.148451000 | -2.109429000 |
| 1 | 1.814902000  | 0.009871000  | -2.683705000 |
| 1 | 2.214132000  | 0.335523000  | -5.135334000 |
| 1 | 1.269318000  | -0.570708000 | -6.321508000 |
| 1 | 1.630817000  | -1.910894000 | -4.261146000 |
| 1 | -0.472924000 | -2.216225000 | -5.552226000 |
| 1 | -0.751933000 | -2.471960000 | -3.828227000 |
| 8 | -0.288131000 | 1.293939000  | -1.627681000 |
| 1 | 0.631134000  | 1.509614000  | -1.364641000 |
| 6 | 0.443537000  | -3.661870000 | -0.330208000 |
| 6 | 0.574540000  | -4.561804000 | 0.904431000  |
| 6 | 0.200473000  | -5.997031000 | 0.539192000  |
| 1 | -0.084528000 | -4.180775000 | 1.687234000  |
| 1 | 1.599369000  | -4.525357000 | 1.280938000  |
| 6 | 1.366281000  | -4.175174000 | -1.437099000 |
| 6 | 0.987487000  | -5.610344000 | -1.796548000 |
| 1 | 2.402590000  | -4.136238000 | -1.094681000 |
| 1 | 1.277863000  | -3.526359000 | -2.310371000 |
| 6 | 1.131118000  | -6.502032000 | -0.563417000 |
| 1 | 2.165771000  | -6.488195000 | -0.212307000 |
| 1 | 0.878784000  | -7.533412000 | -0.819990000 |
| 6 | -1.009065000 | -3.717465000 | -0.813694000 |
| 6 | -1.245483000 | -6.042126000 | 0.046657000  |

|   |              |              |              |
|---|--------------|--------------|--------------|
| 1 | 0.304647000  | -6.634353000 | 1.424804000  |
| 6 | -0.457804000 | -5.651683000 | -2.290772000 |
| 1 | 1.654688000  | -5.970295000 | -2.588256000 |
| 6 | -1.385227000 | -5.148909000 | -1.185135000 |
| 1 | -1.128545000 | -3.055988000 | -1.674877000 |
| 1 | -1.652526000 | -3.352383000 | -0.010165000 |
| 1 | -1.917228000 | -5.695801000 | 0.835524000  |
| 1 | -1.522342000 | -7.068917000 | -0.203194000 |
| 1 | -2.422258000 | -5.172163000 | -1.540899000 |
| 1 | -0.727112000 | -6.673952000 | -2.565755000 |
| 1 | -0.564362000 | -5.026839000 | -3.180651000 |
| 8 | 0.806642000  | -2.323540000 | -0.025296000 |
| 1 | 0.171071000  | -2.007663000 | 0.656913000  |
| 6 | 4.098965000  | -1.106583000 | 0.437627000  |
| 6 | 5.179814000  | -0.239770000 | 1.085038000  |
| 6 | 6.539648000  | -0.919442000 | 0.935291000  |
| 1 | 4.938917000  | -0.092212000 | 2.140180000  |
| 1 | 5.195756000  | 0.739777000  | 0.604737000  |
| 6 | 4.422240000  | -1.306333000 | -1.047036000 |
| 6 | 5.782098000  | -1.985895000 | -1.190077000 |
| 1 | 4.428983000  | -0.335767000 | -1.548605000 |
| 1 | 3.638790000  | -1.913909000 | -1.505691000 |
| 6 | 6.857395000  | -1.109498000 | -0.547883000 |
| 1 | 6.893336000  | -0.139327000 | -1.048843000 |
| 1 | 7.836726000  | -1.580093000 | -0.659158000 |
| 6 | 4.076530000  | -2.466682000 | 1.139435000  |
| 6 | 6.512987000  | -2.280939000 | 1.628603000  |
| 1 | 7.308805000  | -0.289305000 | 1.396246000  |
| 6 | 5.748478000  | -3.346627000 | -0.495292000 |
| 1 | 6.009393000  | -2.123624000 | -2.253166000 |
| 6 | 5.432957000  | -3.151399000 | 0.987246000  |
| 1 | 3.287090000  | -3.078957000 | 0.701174000  |
| 1 | 3.844845000  | -2.322611000 | 2.197591000  |
| 1 | 6.304193000  | -2.152839000 | 2.693151000  |
| 1 | 7.487453000  | -2.765023000 | 1.533786000  |
| 1 | 5.404526000  | -4.126489000 | 1.487145000  |
| 1 | 4.989702000  | -3.981489000 | -0.958934000 |
| 1 | 6.713809000  | -3.845471000 | -0.606619000 |
| 8 | 2.849262000  | -0.443714000 | 0.583403000  |
| 1 | 2.153049000  | -1.058733000 | 0.281065000  |
| 6 | -0.421040000 | -0.933473000 | 2.992603000  |
| 6 | -1.401035000 | -0.831946000 | 4.165454000  |
| 6 | -0.737866000 | -0.094945000 | 5.327070000  |
| 1 | -1.698746000 | -1.837283000 | 4.473177000  |
| 1 | -2.296705000 | -0.301587000 | 3.834271000  |
| 6 | -0.021556000 | 0.476053000  | 2.545965000  |
| 6 | 0.636105000  | 1.213999000  | 3.709643000  |
| 1 | 0.671793000  | 0.404733000  | 1.705880000  |
| 1 | -0.914843000 | 1.005432000  | 2.209155000  |
| 6 | -0.342926000 | 1.311007000  | 4.878625000  |
| 1 | -1.232441000 | 1.866353000  | 4.572336000  |
| 1 | 0.119707000  | 1.850241000  | 5.708786000  |
| 6 | 0.826253000  | -1.696066000 | 3.439962000  |
| 6 | 0.511717000  | -0.855156000 | 5.770553000  |
| 1 | -1.441782000 | -0.028672000 | 6.164853000  |



|   |              |              |             |
|---|--------------|--------------|-------------|
| 6 | 1.886365000  | 0.448460000  | 4.140043000 |
| 1 | 0.919286000  | 2.223227000  | 3.391300000 |
| 6 | 1.487963000  | -0.953634000 | 4.598864000 |
| 1 | 1.516822000  | -1.774176000 | 2.600350000 |
| 1 | 0.543510000  | -2.705702000 | 3.745398000 |
| 1 | 0.237209000  | -1.856461000 | 6.110647000 |
| 1 | 0.985257000  | -0.335591000 | 6.607042000 |
| 1 | 2.382135000  | -1.503444000 | 4.916034000 |
| 1 | 2.575427000  | 0.377209000  | 3.296104000 |
| 1 | 2.391106000  | 0.978306000  | 4.951462000 |
| 8 | -1.014555000 | -1.642292000 | 1.913438000 |
| 1 | -1.829715000 | -1.149668000 | 1.668398000 |

---

**2bCL4**

|   |              |              |              |
|---|--------------|--------------|--------------|
| 6 | 2.777079000  | 0.282455000  | -1.125878000 |
| 6 | 1.930039000  | 0.140053000  | -2.395012000 |
| 6 | 2.809147000  | 0.283245000  | -3.632873000 |
| 6 | 3.470059000  | 1.659797000  | -3.624408000 |
| 6 | 4.321380000  | 1.803935000  | -2.364736000 |
| 1 | 2.704686000  | 2.439249000  | -3.646987000 |
| 1 | 4.097231000  | 1.779179000  | -4.511090000 |
| 6 | 3.453862000  | 1.661284000  | -1.112116000 |
| 1 | 1.152868000  | 0.907882000  | -2.385661000 |
| 1 | 1.439719000  | -0.836057000 | -2.390261000 |
| 6 | 5.407991000  | 0.726102000  | -2.336937000 |
| 1 | 4.794758000  | 2.793327000  | -2.358453000 |
| 6 | 3.884547000  | -0.801256000 | -3.612823000 |
| 1 | 2.193567000  | 0.175435000  | -4.533048000 |
| 6 | 3.870180000  | -0.792889000 | -1.099263000 |
| 6 | 4.735522000  | -0.648938000 | -2.353578000 |
| 1 | 5.507019000  | -1.427987000 | -2.341376000 |
| 1 | 3.417139000  | -1.788688000 | -3.627783000 |
| 1 | 4.517413000  | -0.715983000 | -4.499375000 |
| 8 | 1.951557000  | 0.112120000  | 0.018139000  |
| 6 | 4.310035000  | 1.813500000  | 0.144202000  |
| 1 | 2.670934000  | 2.429561000  | -1.117726000 |
| 6 | 6.269833000  | 0.877813000  | -1.085168000 |
| 1 | 6.040054000  | 0.828714000  | -3.227208000 |
| 6 | 4.727401000  | -0.639225000 | 0.156219000  |
| 1 | 3.391684000  | -1.778449000 | -1.094363000 |
| 6 | 5.391960000  | 0.735573000  | 0.156161000  |
| 1 | 6.757232000  | 1.855976000  | -1.087234000 |
| 1 | 7.051454000  | 0.114090000  | -1.078707000 |
| 1 | 5.485597000  | -1.425666000 | 0.182750000  |
| 1 | 4.095599000  | -0.742488000 | 1.040140000  |
| 1 | 3.679735000  | 1.712104000  | 1.029570000  |
| 1 | 4.766775000  | 2.806249000  | 0.162433000  |
| 1 | 6.007757000  | 0.844701000  | 1.056146000  |
| 1 | 1.281986000  | 0.832497000  | 0.005871000  |
| 6 | 0.299392000  | -2.686989000 | 1.093742000  |
| 6 | 0.218102000  | -1.787085000 | 2.331740000  |
| 6 | 0.374364000  | -2.621334000 | 3.598730000  |
| 6 | -0.741477000 | -3.662956000 | 3.653533000  |
| 6 | -0.652790000 | -4.566532000 | 2.425231000  |
| 1 | -1.713768000 | -3.165209000 | 3.678938000  |

---

|   |              |              |              |
|---|--------------|--------------|--------------|
| 1 | -0.647720000 | -4.263204000 | 4.561634000  |
| 6 | -0.808606000 | -3.746481000 | 1.142225000  |
| 1 | -0.745809000 | -1.272715000 | 2.336699000  |
| 1 | 1.005607000  | -1.031769000 | 2.271289000  |
| 6 | 0.700379000  | -5.281664000 | 2.395607000  |
| 1 | -1.454777000 | -5.313179000 | 2.466177000  |
| 6 | 1.730080000  | -3.323756000 | 3.576218000  |
| 1 | 0.312109000  | -1.967964000 | 4.476308000  |
| 6 | 1.656576000  | -3.406478000 | 1.067775000  |
| 6 | 1.810544000  | -4.228876000 | 2.348812000  |
| 1 | 2.784874000  | -4.731959000 | 2.332831000  |
| 1 | 2.532105000  | -2.582551000 | 3.543893000  |
| 1 | 1.858081000  | -3.918141000 | 4.484015000  |
| 8 | 0.122156000  | -1.902984000 | -0.077971000 |
| 6 | -0.719468000 | -4.656936000 | -0.081588000 |
| 1 | -1.779096000 | -3.238171000 | 1.147073000  |
| 6 | 0.788867000  | -6.195554000 | 1.175039000  |
| 1 | 0.810540000  | -5.881849000 | 3.306775000  |
| 6 | 1.743263000  | -4.314378000 | -0.158110000 |
| 1 | 2.449218000  | -2.650782000 | 1.019379000  |
| 6 | 0.634518000  | -5.362885000 | -0.095594000 |
| 1 | 0.002864000  | -6.953396000 | 1.221532000  |
| 1 | 1.752112000  | -6.711711000 | 1.167818000  |
| 1 | 2.721802000  | -4.799745000 | -0.190764000 |
| 1 | 1.629462000  | -3.715096000 | -1.064140000 |
| 1 | -0.831490000 | -4.057636000 | -0.986949000 |
| 1 | -1.528445000 | -5.391049000 | -0.054231000 |
| 1 | 0.697883000  | -6.016540000 | -0.973134000 |
| 1 | 0.847709000  | -1.234786000 | -0.092260000 |
| 6 | -2.755910000 | -0.308290000 | -1.127448000 |
| 6 | -1.896373000 | -0.274983000 | -2.395437000 |
| 6 | -2.773250000 | -0.451621000 | -3.630494000 |
| 6 | -3.495110000 | -1.794828000 | -3.548064000 |
| 6 | -4.360994000 | -1.827749000 | -2.290449000 |
| 1 | -2.765552000 | -2.607532000 | -3.517580000 |
| 1 | -4.120578000 | -1.937855000 | -4.432459000 |
| 6 | -3.495614000 | -1.652299000 | -1.040849000 |
| 1 | -1.152265000 | -1.072765000 | -2.336337000 |
| 1 | -1.364892000 | 0.678424000  | -2.440643000 |
| 6 | -5.397892000 | -0.702715000 | -2.334441000 |
| 1 | -4.878069000 | -2.793065000 | -2.231725000 |
| 6 | -3.799522000 | 0.678417000  | -3.682998000 |
| 1 | -2.147963000 | -0.423507000 | -4.530001000 |
| 6 | -3.800414000 | 0.814071000  | -1.172549000 |
| 6 | -4.663703000 | 0.637485000  | -2.424155000 |
| 1 | -5.399495000 | 1.449808000  | -2.463128000 |
| 1 | -3.288326000 | 1.641704000  | -3.752240000 |
| 1 | -4.430609000 | 0.569392000  | -4.568200000 |
| 8 | -1.931422000 | -0.111357000 | 0.011599000  |
| 6 | -4.364129000 | -1.690127000 | 0.215593000  |
| 1 | -2.751596000 | -2.455983000 | -0.994339000 |
| 6 | -6.273278000 | -0.743598000 | -1.083567000 |
| 1 | -6.028490000 | -0.827590000 | -3.222897000 |
| 6 | -4.671906000 | 0.773812000  | 0.081907000  |
| 1 | -3.276393000 | 1.776043000  | -1.222814000 |

|   |              |              |              |
|---|--------------|--------------|--------------|
| 6 | -5.397788000 | -0.567629000 | 0.155038000  |
| 1 | -6.802937000 | -1.698166000 | -1.033429000 |
| 1 | -7.020782000 | 0.052431000  | -1.127808000 |
| 1 | -5.394797000 | 1.593170000  | 0.054967000  |
| 1 | -4.042048000 | 0.899583000  | 0.964007000  |
| 1 | -3.733809000 | -1.558645000 | 1.097746000  |
| 1 | -4.861993000 | -2.659840000 | 0.292396000  |
| 1 | -6.023499000 | -0.596280000 | 1.054372000  |
| 1 | -1.250454000 | -0.825222000 | 0.006683000  |
| 6 | -0.365625000 | 3.135386000  | 0.536455000  |
| 6 | -0.567222000 | 4.199588000  | -0.552869000 |
| 6 | -0.817536000 | 5.565267000  | 0.074809000  |
| 6 | -2.071883000 | 5.492545000  | 0.942354000  |
| 6 | -1.869274000 | 4.446168000  | 2.035910000  |
| 1 | -2.935129000 | 5.225920000  | 0.327614000  |
| 1 | -2.270541000 | 6.467037000  | 1.394658000  |
| 6 | -1.612339000 | 3.064525000  | 1.425806000  |
| 1 | -1.412659000 | 3.906566000  | -1.180995000 |
| 1 | 0.322981000  | 4.225287000  | -1.185881000 |
| 6 | -0.675145000 | 4.829385000  | 2.913536000  |
| 1 | -2.771686000 | 4.393837000  | 2.656773000  |
| 6 | 0.383091000  | 5.947704000  | 0.937367000  |
| 1 | -0.957344000 | 6.311841000  | -0.715262000 |
| 6 | 0.830193000  | 3.519297000  | 1.423648000  |
| 6 | 0.574612000  | 4.900654000  | 2.032547000  |
| 1 | 1.436706000  | 5.178310000  | 2.650779000  |
| 1 | 1.281645000  | 6.006849000  | 0.318529000  |
| 1 | 0.220825000  | 6.929603000  | 1.388296000  |
| 8 | -0.091459000 | 1.899741000  | -0.113870000 |
| 6 | -1.425026000 | 2.034327000  | 2.539210000  |
| 1 | -2.470056000 | 2.775957000  | 0.807201000  |
| 6 | -0.482669000 | 3.799474000  | 4.024839000  |
| 1 | -0.857816000 | 5.814298000  | 3.359778000  |
| 6 | 1.024157000  | 2.487821000  | 2.535177000  |
| 1 | 1.730677000  | 3.554156000  | 0.800652000  |
| 6 | -0.229856000 | 2.427346000  | 3.403981000  |
| 1 | -1.373569000 | 3.765810000  | 4.656860000  |
| 1 | 0.363428000  | 4.087170000  | 4.653779000  |
| 1 | 1.887365000  | 2.769284000  | 3.143859000  |
| 1 | 1.221692000  | 1.506739000  | 2.101748000  |
| 1 | -1.268752000 | 1.045012000  | 2.107412000  |
| 1 | -2.330699000 | 1.993400000  | 3.149728000  |
| 1 | -0.090771000 | 1.683723000  | 4.196788000  |
| 1 | -0.868403000 | 1.300477000  | -0.055116000 |

---

**3bCL7**

|   |              |             |              |
|---|--------------|-------------|--------------|
| 6 | -0.853712000 | 2.567146000 | -0.326882000 |
| 6 | -2.091836000 | 2.759430000 | 0.545833000  |
| 6 | -2.616843000 | 4.183503000 | 0.383765000  |
| 6 | -1.549606000 | 5.194821000 | 0.808977000  |
| 6 | -0.307538000 | 4.991670000 | -0.062222000 |
| 1 | -1.284764000 | 5.022361000 | 1.859251000  |
| 6 | -2.079465000 | 6.618304000 | 0.649693000  |
| 6 | 0.219853000  | 3.567789000 | 0.101741000  |
| 1 | -1.835382000 | 2.568101000 | 1.589648000  |

---

|   |              |              |              |
|---|--------------|--------------|--------------|
| 1 | -2.854708000 | 2.046062000  | 0.234494000  |
| 6 | -0.680831000 | 5.255146000  | -1.522787000 |
| 1 | 0.471360000  | 5.699481000  | 0.247057000  |
| 6 | -2.994661000 | 4.443662000  | -1.076162000 |
| 1 | -3.503864000 | 4.308998000  | 1.015780000  |
| 6 | -1.238860000 | 2.816991000  | -1.786182000 |
| 6 | -1.750450000 | 4.246023000  | -1.944332000 |
| 1 | -2.013622000 | 4.414293000  | -2.994496000 |
| 1 | -3.757644000 | 3.722218000  | -1.386794000 |
| 6 | -3.527160000 | 5.865573000  | -1.236034000 |
| 8 | -0.395975000 | 1.223492000  | -0.142399000 |
| 1 | 1.116668000  | 3.426018000  | -0.506356000 |
| 1 | 0.488605000  | 3.385644000  | 1.144178000  |
| 1 | 0.208273000  | 5.127911000  | -2.153198000 |
| 6 | -1.211062000 | 6.678412000  | -1.684180000 |
| 1 | -0.375092000 | 2.647947000  | -2.432091000 |
| 1 | -2.029285000 | 2.123678000  | -2.075361000 |
| 6 | -2.450841000 | 6.863403000  | -0.811412000 |
| 1 | -1.462401000 | 6.861719000  | -2.731500000 |
| 1 | -0.440747000 | 7.397348000  | -1.393642000 |
| 1 | -4.420775000 | 6.000031000  | -0.621661000 |
| 1 | -3.807684000 | 6.040943000  | -2.277119000 |
| 1 | -1.317877000 | 7.335485000  | 0.966122000  |
| 1 | -2.956644000 | 6.759448000  | 1.285656000  |
| 1 | 0.446210000  | 1.103589000  | -0.629710000 |
| 1 | -2.830307000 | 7.885080000  | -0.926644000 |
| 6 | -4.354601000 | -3.808997000 | 4.242488000  |
| 6 | -4.670434000 | -3.353039000 | 2.819341000  |
| 6 | -3.639806000 | -2.316992000 | 2.376557000  |
| 6 | -3.678204000 | -1.104313000 | 3.309425000  |
| 6 | -3.376054000 | -1.568437000 | 4.736339000  |
| 1 | -4.678125000 | -0.655785000 | 3.277965000  |
| 6 | -2.652218000 | -0.065107000 | 2.865525000  |
| 6 | -4.404528000 | -2.605934000 | 5.181936000  |
| 1 | -5.672977000 | -2.919238000 | 2.782945000  |
| 1 | -4.651330000 | -4.209503000 | 2.140841000  |
| 6 | -1.968677000 | -2.170209000 | 4.770314000  |
| 1 | -3.415941000 | -0.706033000 | 5.412436000  |
| 6 | -2.233178000 | -2.917960000 | 2.412825000  |
| 1 | -3.861990000 | -1.994584000 | 1.352467000  |
| 6 | -2.956741000 | -4.423392000 | 4.281943000  |
| 6 | -1.929177000 | -3.383885000 | 3.838288000  |
| 1 | -0.927285000 | -3.828589000 | 3.866860000  |
| 1 | -2.190292000 | -3.778970000 | 1.734997000  |
| 6 | -1.210966000 | -1.877260000 | 1.963416000  |
| 1 | -5.092076000 | -4.554325000 | 4.561247000  |
| 1 | -4.191644000 | -2.923505000 | 6.205600000  |
| 1 | -5.404276000 | -2.165041000 | 5.169188000  |
| 1 | -1.737575000 | -2.491391000 | 5.792744000  |
| 6 | -0.937408000 | -1.133653000 | 4.330141000  |
| 1 | -2.728023000 | -4.762317000 | 5.295273000  |
| 1 | -2.913321000 | -5.292277000 | 3.620674000  |
| 6 | -1.249629000 | -0.674243000 | 2.905594000  |
| 1 | 0.067176000  | -1.560945000 | 4.360492000  |
| 1 | -0.956521000 | -0.270147000 | 4.998664000  |

|   |               |              |              |
|---|---------------|--------------|--------------|
| 1 | -1.444214000  | -1.543822000 | 0.950940000  |
| 1 | -0.207768000  | -2.307054000 | 1.965186000  |
| 1 | -2.690408000  | 0.808676000  | 3.520455000  |
| 1 | -2.867866000  | 0.262128000  | 1.847276000  |
| 8 | -0.267496000  | 0.288131000  | 2.538785000  |
| 1 | -0.414385000  | 0.563599000  | 1.611575000  |
| 6 | -9.686437000  | -0.194501000 | 0.497453000  |
| 6 | -8.659990000  | -1.210784000 | 0.993880000  |
| 6 | -7.293468000  | -0.889621000 | 0.392685000  |
| 6 | -7.360241000  | -0.948761000 | -1.135088000 |
| 6 | -8.399531000  | 0.062493000  | -1.624511000 |
| 1 | -7.662649000  | -1.956586000 | -1.444676000 |
| 6 | -5.992731000  | -0.631200000 | -1.733076000 |
| 6 | -9.767877000  | -0.258384000 | -1.026328000 |
| 1 | -8.964592000  | -2.219667000 | 0.704745000  |
| 1 | -8.602285000  | -1.178399000 | 2.084948000  |
| 6 | -7.954558000  | 1.466403000  | -1.206824000 |
| 1 | -8.462226000  | 0.014666000  | -2.718099000 |
| 6 | -6.850019000  | 0.514256000  | 0.808909000  |
| 1 | -6.558420000  | -1.620940000 | 0.749525000  |
| 6 | -9.257119000  | 1.208374000  | 0.921938000  |
| 6 | -7.889242000  | 1.526600000  | 0.321477000  |
| 1 | -7.583599000  | 2.533546000  | 0.629764000  |
| 1 | -6.783376000  | 0.563382000  | 1.902911000  |
| 6 | -5.484063000  | 0.835873000  | 0.210739000  |
| 1 | -10.668068000 | -0.424178000 | 0.927616000  |
| 1 | -10.508601000 | 0.458210000  | -1.389501000 |
| 1 | -10.084870000 | -1.255886000 | -1.340651000 |
| 1 | -8.686753000  | 2.199238000  | -1.566119000 |
| 6 | -6.589787000  | 1.790779000  | -1.808535000 |
| 1 | -9.991716000  | 1.941600000  | 0.580222000  |
| 1 | -9.206342000  | 1.268413000  | 2.012022000  |
| 6 | -5.553462000  | 0.777736000  | -1.319929000 |
| 1 | -6.271506000  | 2.794160000  | -1.517975000 |
| 1 | -6.632286000  | 1.758181000  | -2.898852000 |
| 1 | -4.741133000  | 0.115780000  | 0.561172000  |
| 1 | -5.166666000  | 1.834380000  | 0.520375000  |
| 1 | -6.034136000  | -0.689410000 | -2.823459000 |
| 1 | -5.251771000  | -1.354008000 | -1.382345000 |
| 8 | -4.310470000  | 1.115693000  | -1.900596000 |
| 1 | -3.656946000  | 0.430433000  | -1.652512000 |
| 6 | 0.144708000   | -3.920839000 | -5.637547000 |
| 6 | 1.251278000   | -3.099493000 | -4.978153000 |
| 6 | 0.655190000   | -2.258541000 | -3.852039000 |
| 6 | -0.411703000  | -1.310885000 | -4.404013000 |
| 6 | -1.509770000  | -2.138766000 | -5.074791000 |
| 1 | 0.044596000   | -0.646772000 | -5.148076000 |
| 6 | -0.992405000  | -0.465996000 | -3.272599000 |
| 6 | -0.917706000  | -2.980530000 | -6.203740000 |
| 1 | 1.723168000   | -2.449086000 | -5.718954000 |
| 1 | 2.021290000   | -3.764150000 | -4.577940000 |
| 6 | -2.153832000  | -3.043069000 | -4.021240000 |
| 1 | -2.270617000  | -1.464756000 | -5.485264000 |
| 6 | 0.009604000   | -3.164637000 | -2.802918000 |
| 1 | 1.444425000   | -1.667359000 | -3.374485000 |

|   |              |              |              |
|---|--------------|--------------|--------------|
| 6 | -0.496062000 | -4.837537000 | -4.597337000 |
| 6 | -1.088865000 | -3.994085000 | -3.470296000 |
| 1 | -1.546079000 | -4.655811000 | -2.724726000 |
| 1 | 0.769241000  | -3.841786000 | -2.393705000 |
| 6 | -0.572294000 | -2.323134000 | -1.671189000 |
| 1 | 0.568999000  | -4.525258000 | -6.447349000 |
| 1 | -1.707510000 | -3.560456000 | -6.687302000 |
| 1 | -0.472723000 | -2.327252000 | -6.958295000 |
| 1 | -2.955684000 | -3.627885000 | -4.486949000 |
| 6 | -2.744639000 | -2.199008000 | -2.894682000 |
| 1 | -1.280960000 | -5.437839000 | -5.063643000 |
| 1 | 0.253197000  | -5.522552000 | -4.192352000 |
| 6 | -1.640542000 | -1.377407000 | -2.228599000 |
| 1 | -3.216605000 | -2.839475000 | -2.146169000 |
| 1 | -3.503921000 | -1.521748000 | -3.289520000 |
| 1 | 0.215271000  | -1.731611000 | -1.196988000 |
| 1 | -1.022522000 | -2.971385000 | -0.915511000 |
| 1 | -1.740355000 | 0.227798000  | -3.662938000 |
| 1 | -0.193196000 | 0.110362000  | -2.801342000 |
| 8 | -2.235721000 | -0.622312000 | -1.180073000 |
| 1 | -1.573296000 | 0.016714000  | -0.842390000 |
| 6 | 4.417594000  | -7.152230000 | 0.462693000  |
| 6 | 5.611988000  | -6.395591000 | -0.114543000 |
| 6 | 5.295248000  | -4.902271000 | -0.161120000 |
| 6 | 4.068647000  | -4.647998000 | -1.041243000 |
| 6 | 2.880288000  | -5.420095000 | -0.464021000 |
| 1 | 4.272876000  | -5.004910000 | -2.057894000 |
| 6 | 3.763758000  | -3.153026000 | -1.093357000 |
| 6 | 3.193743000  | -6.914091000 | -0.419228000 |
| 1 | 5.832100000  | -6.759182000 | -1.121269000 |
| 1 | 6.496095000  | -6.567501000 | 0.504123000  |
| 6 | 2.592249000  | -4.896747000 | 0.944799000  |
| 1 | 1.999207000  | -5.255847000 | -1.095957000 |
| 6 | 5.005246000  | -4.378881000 | 1.247927000  |
| 1 | 6.155167000  | -4.363330000 | -0.576636000 |
| 6 | 4.131344000  | -6.645199000 | 1.874639000  |
| 6 | 3.817123000  | -5.151385000 | 1.826119000  |
| 1 | 3.612034000  | -4.790581000 | 2.840890000  |
| 1 | 5.885299000  | -4.541516000 | 1.881537000  |
| 6 | 4.690109000  | -2.885749000 | 1.205360000  |
| 1 | 4.643181000  | -8.224089000 | 0.495961000  |
| 1 | 2.335361000  | -7.460197000 | -0.020557000 |
| 1 | 3.385584000  | -7.283336000 | -1.429732000 |
| 1 | 1.729666000  | -5.431706000 | 1.359942000  |
| 6 | 2.277891000  | -3.404304000 | 0.895902000  |
| 1 | 3.284161000  | -7.188221000 | 2.300600000  |
| 1 | 4.998353000  | -6.821046000 | 2.515966000  |
| 6 | 3.468236000  | -2.637980000 | 0.314825000  |
| 1 | 2.076164000  | -3.026269000 | 1.901385000  |
| 1 | 1.396788000  | -3.226394000 | 0.276424000  |
| 1 | 5.544067000  | -2.328030000 | 0.812880000  |
| 1 | 4.476935000  | -2.516061000 | 2.210547000  |
| 1 | 2.905005000  | -2.956743000 | -1.737525000 |
| 1 | 4.622560000  | -2.615823000 | -1.501756000 |
| 8 | 3.180506000  | -1.248441000 | 0.236446000  |

|   |             |              |              |
|---|-------------|--------------|--------------|
| 1 | 2.906124000 | -0.961517000 | 1.138018000  |
| 6 | 6.445428000 | 3.398868000  | -4.352626000 |
| 6 | 5.563284000 | 2.678038000  | -5.369856000 |
| 6 | 4.435844000 | 1.949657000  | -4.641424000 |
| 6 | 5.012695000 | 0.924776000  | -3.662109000 |
| 6 | 5.908819000 | 1.650704000  | -2.656074000 |
| 1 | 5.610446000 | 0.191443000  | -4.216197000 |
| 6 | 3.883218000 | 0.199913000  | -2.935729000 |
| 6 | 7.037784000 | 2.378527000  | -3.382710000 |
| 1 | 6.160232000 | 1.961047000  | -5.938512000 |
| 1 | 5.143506000 | 3.398693000  | -6.075759000 |
| 6 | 5.054562000 | 2.649415000  | -1.872475000 |
| 1 | 6.337142000 | 0.919163000  | -1.960568000 |
| 6 | 3.581875000 | 2.948105000  | -3.856999000 |
| 1 | 3.804946000 | 1.433047000  | -5.374438000 |
| 6 | 5.601901000 | 4.407096000  | -3.575147000 |
| 6 | 4.474716000 | 3.676321000  | -2.848708000 |
| 1 | 3.872153000 | 4.404184000  | -2.291631000 |
| 1 | 3.150070000 | 3.678854000  | -4.550972000 |
| 6 | 2.448964000 | 2.225410000  | -3.132428000 |
| 1 | 7.254571000 | 3.922298000  | -4.874084000 |
| 1 | 7.680163000 | 2.883594000  | -2.657298000 |
| 1 | 7.651391000 | 1.658280000  | -3.929102000 |
| 1 | 5.683385000 | 3.165486000  | -1.136853000 |
| 6 | 3.927769000 | 1.922525000  | -1.143548000 |
| 1 | 6.226696000 | 4.936043000  | -2.851447000 |
| 1 | 5.182061000 | 5.147911000  | -4.259801000 |
| 6 | 3.030917000 | 1.203847000  | -2.155997000 |
| 1 | 3.332979000 | 2.639385000  | -0.571580000 |
| 1 | 4.336500000 | 1.184925000  | -0.448062000 |
| 1 | 1.802325000 | 1.711721000  | -3.847398000 |
| 1 | 1.841032000 | 2.948560000  | -2.584978000 |
| 1 | 4.290349000 | -0.532463000 | -2.236571000 |
| 1 | 3.253804000 | -0.328815000 | -3.655322000 |
| 8 | 1.954715000 | 0.544174000  | -1.498604000 |
| 1 | 2.344624000 | -0.152103000 | -0.929253000 |
| 6 | 2.997959000 | 0.584101000  | 3.289496000  |
| 6 | 2.558761000 | 1.845743000  | 2.546287000  |
| 6 | 3.302062000 | 3.058906000  | 3.096051000  |
| 6 | 2.985389000 | 3.235082000  | 4.583129000  |
| 6 | 3.411666000 | 1.968045000  | 5.329382000  |
| 1 | 1.905593000 | 3.379804000  | 4.706691000  |
| 6 | 3.724816000 | 4.450066000  | 5.139488000  |
| 6 | 2.670535000 | 0.752674000  | 4.776144000  |
| 1 | 1.481889000 | 1.968908000  | 2.679298000  |
| 1 | 2.759089000 | 1.722547000  | 1.480999000  |
| 6 | 4.922918000 | 1.785966000  | 5.166239000  |
| 1 | 3.174188000 | 2.078890000  | 6.394076000  |
| 6 | 4.812371000 | 2.875573000  | 2.929971000  |
| 1 | 2.984630000 | 3.955354000  | 2.549475000  |
| 6 | 4.505353000 | 0.393527000  | 3.123397000  |
| 6 | 5.239499000 | 1.610838000  | 3.678959000  |
| 1 | 6.318889000 | 1.464269000  | 3.554255000  |
| 1 | 5.046877000 | 2.761222000  | 1.865044000  |
| 6 | 5.554000000 | 4.090450000  | 3.483932000  |

|   |             |              |             |
|---|-------------|--------------|-------------|
| 8 | 2.340086000 | -0.557284000 | 2.756030000 |
| 1 | 2.963887000 | -0.150176000 | 5.316953000 |
| 1 | 1.591553000 | 0.879824000  | 4.891037000 |
| 1 | 5.239018000 | 0.888056000  | 5.710422000 |
| 6 | 5.664739000 | 2.999528000  | 5.722799000 |
| 1 | 4.815221000 | -0.509233000 | 3.654066000 |
| 1 | 4.738971000 | 0.260208000  | 2.065236000 |
| 6 | 5.229588000 | 4.253583000  | 4.967565000 |
| 1 | 6.742690000 | 2.855576000  | 5.616106000 |
| 1 | 5.445846000 | 3.111520000  | 6.787443000 |
| 1 | 5.255018000 | 4.987933000  | 2.936859000 |
| 1 | 6.630734000 | 3.960212000  | 3.350838000 |
| 1 | 3.484859000 | 4.578080000  | 6.197744000 |
| 1 | 3.404280000 | 5.351869000  | 4.612062000 |
| 1 | 1.381442000 | -0.340047000 | 2.715578000 |
| 1 | 5.761589000 | 5.124972000  | 5.365856000 |

---

**4bCL8**

|   |              |             |              |
|---|--------------|-------------|--------------|
| 6 | -3.838512000 | 2.887562000 | -0.194337000 |
| 6 | -2.663329000 | 1.938038000 | -0.434884000 |
| 6 | -1.389740000 | 2.738641000 | -0.677180000 |
| 6 | -1.554237000 | 3.632176000 | -1.908644000 |
| 6 | -2.735847000 | 4.577773000 | -1.672853000 |
| 1 | -1.761361000 | 3.006932000 | -2.784352000 |
| 6 | -0.281322000 | 4.438317000 | -2.157717000 |
| 6 | -4.012931000 | 3.775975000 | -1.429608000 |
| 1 | -2.889973000 | 1.308588000 | -1.297349000 |
| 1 | -2.537487000 | 1.293632000 | 0.436637000  |
| 6 | -2.424611000 | 5.461746000 | -0.461261000 |
| 1 | -2.875040000 | 5.211107000 | -2.557029000 |
| 6 | -1.087697000 | 3.618787000 | 0.537651000  |
| 1 | -0.555415000 | 2.046295000 | -0.837582000 |
| 6 | -3.540614000 | 3.766869000 | 1.019964000  |
| 6 | -2.265000000 | 4.567596000 | 0.770815000  |
| 1 | -2.057253000 | 5.192243000 | 1.646587000  |
| 1 | -0.955908000 | 2.985000000 | 1.420707000  |
| 6 | 0.195414000  | 4.404029000 | 0.294864000  |
| 8 | -5.022727000 | 2.150108000 | 0.070788000  |
| 1 | -4.859635000 | 4.448876000 | -1.275735000 |
| 1 | -4.232682000 | 3.145531000 | -2.294421000 |
| 1 | -3.255152000 | 6.158050000 | -0.299237000 |
| 6 | -1.143757000 | 6.261554000 | -0.698976000 |
| 1 | -4.385997000 | 4.434548000 | 1.197299000  |
| 1 | -3.419707000 | 3.133600000 | 1.900720000  |
| 6 | 0.023772000  | 5.297547000 | -0.932047000 |
| 1 | -0.924002000 | 6.891338000 | 0.165571000  |
| 1 | -1.262971000 | 6.913974000 | -1.568458000 |
| 1 | 1.018109000  | 3.709995000 | 0.124485000  |
| 1 | 0.446167000  | 5.016990000 | 1.161562000  |
| 1 | -0.417493000 | 5.082795000 | -3.032016000 |
| 1 | 0.565098000  | 3.780327000 | -2.362933000 |
| 1 | -5.160041000 | 1.541845000 | -0.694316000 |
| 8 | 1.246856000  | 6.016038000 | -1.110776000 |
| 1 | 1.294358000  | 6.310348000 | -2.027562000 |
| 6 | 7.795127000  | 8.491404000 | 0.937020000  |

---



|   |              |              |              |
|---|--------------|--------------|--------------|
| 6 | 6.529552000  | 9.238495000  | 0.501386000  |
| 6 | 5.428921000  | 8.235023000  | 0.164663000  |
| 6 | 5.882363000  | 7.314325000  | -0.971190000 |
| 6 | 7.149964000  | 6.576615000  | -0.532285000 |
| 1 | 6.104440000  | 7.917325000  | -1.858832000 |
| 6 | 4.780000000  | 6.313297000  | -1.309237000 |
| 6 | 8.253266000  | 7.575769000  | -0.197759000 |
| 1 | 6.760137000  | 9.857091000  | -0.368792000 |
| 1 | 6.197485000  | 9.901064000  | 1.306486000  |
| 6 | 6.821469000  | 5.721341000  | 0.694031000  |
| 1 | 7.490454000  | 5.927037000  | -1.346574000 |
| 6 | 5.099770000  | 7.379099000  | 1.390773000  |
| 1 | 4.530097000  | 8.779172000  | -0.147762000 |
| 6 | 7.469471000  | 7.641564000  | 2.170397000  |
| 6 | 6.367236000  | 6.641045000  | 1.830354000  |
| 1 | 6.142421000  | 6.036983000  | 2.716504000  |
| 1 | 4.758191000  | 8.028455000  | 2.204983000  |
| 6 | 3.997227000  | 6.377879000  | 1.056427000  |
| 8 | 8.857993000  | 9.392020000  | 1.199840000  |
| 1 | 9.162588000  | 7.058049000  | 0.111445000  |
| 1 | 8.497723000  | 8.186913000  | -1.067929000 |
| 1 | 7.720114000  | 5.177632000  | 1.006294000  |
| 6 | 5.721797000  | 4.716217000  | 0.362846000  |
| 1 | 8.372216000  | 7.118564000  | 2.493699000  |
| 1 | 7.145258000  | 8.290539000  | 2.989585000  |
| 6 | 4.462829000  | 5.461503000  | -0.076445000 |
| 1 | 5.490268000  | 4.110852000  | 1.239998000  |
| 1 | 6.047394000  | 4.047291000  | -0.437226000 |
| 1 | 3.090874000  | 6.901586000  | 0.741981000  |
| 1 | 3.752252000  | 5.774566000  | 1.932934000  |
| 1 | 5.097425000  | 5.667618000  | -2.131356000 |
| 1 | 3.876345000  | 6.840924000  | -1.623589000 |
| 1 | 8.592931000  | 9.979096000  | 1.916552000  |
| 8 | 3.457368000  | 4.497856000  | -0.379362000 |
| 1 | 2.629492000  | 5.000249000  | -0.535562000 |
| 6 | -5.346825000 | 0.082304000  | 2.879618000  |
| 6 | -5.067059000 | -1.173704000 | 3.704557000  |
| 6 | -6.051267000 | -1.252625000 | 4.868236000  |
| 6 | -5.911381000 | -0.022286000 | 5.768687000  |
| 6 | -6.187649000 | 1.232112000  | 4.935769000  |
| 1 | -4.889437000 | 0.022774000  | 6.162852000  |
| 6 | -6.893616000 | -0.108264000 | 6.934594000  |
| 6 | -5.204310000 | 1.318985000  | 3.771727000  |
| 1 | -4.039698000 | -1.140590000 | 4.073179000  |
| 1 | -5.168712000 | -2.052455000 | 3.064902000  |
| 6 | -7.623580000 | 1.168237000  | 4.409074000  |
| 1 | -6.074104000 | 2.118772000  | 5.569755000  |
| 6 | -7.487306000 | -1.316138000 | 4.340841000  |
| 1 | -5.839441000 | -2.155553000 | 5.452924000  |
| 6 | -6.778826000 | 0.022934000  | 2.343354000  |
| 6 | -7.762448000 | -0.061446000 | 3.507718000  |
| 1 | -8.783653000 | -0.106847000 | 3.113147000  |
| 1 | -7.600121000 | -2.202940000 | 3.706671000  |
| 6 | -8.472379000 | -1.404361000 | 5.504250000  |
| 8 | -4.409947000 | 0.126081000  | 1.814705000  |

|   |              |               |              |
|---|--------------|---------------|--------------|
| 1 | -5.403260000 | 2.213605000   | 3.176621000  |
| 1 | -4.178847000 | 1.378910000   | 4.144414000  |
| 1 | -7.834224000 | 2.070418000   | 3.824206000  |
| 6 | -8.608610000 | 1.085903000   | 5.571227000  |
| 1 | -6.973530000 | 0.917116000   | 1.746781000  |
| 1 | -6.885140000 | -0.848724000  | 1.694289000  |
| 6 | -8.328490000 | -0.168095000  | 6.398762000  |
| 1 | -9.635543000 | 1.045060000   | 5.204944000  |
| 1 | -8.519709000 | 1.961630000   | 6.216004000  |
| 1 | -8.278872000 | -2.307858000  | 6.090733000  |
| 1 | -9.497346000 | -1.459528000  | 5.131119000  |
| 1 | -6.789722000 | 0.763400000   | 7.584506000  |
| 1 | -6.686487000 | -1.000667000  | 7.533295000  |
| 1 | -4.629662000 | 0.909682000   | 1.256754000  |
| 8 | -9.271019000 | -0.187815000  | 7.457726000  |
| 1 | -9.116263000 | -0.974647000  | 7.992093000  |
| 6 | 7.293549000  | -8.582014000  | 1.125021000  |
| 6 | 7.123576000  | -7.383041000  | 2.057490000  |
| 6 | 6.174835000  | -6.368759000  | 1.425916000  |
| 6 | 6.739159000  | -5.881301000  | 0.089201000  |
| 6 | 6.913518000  | -7.083756000  | -0.841999000 |
| 1 | 7.715499000  | -5.410975000  | 0.257600000  |
| 6 | 5.794429000  | -4.862662000  | -0.542263000 |
| 6 | 7.862768000  | -8.102109000  | -0.214906000 |
| 1 | 8.102768000  | -6.937417000  | 2.241262000  |
| 1 | 6.731801000  | -7.732324000  | 3.013800000  |
| 6 | 5.542192000  | -7.719011000  | -1.088411000 |
| 1 | 7.333154000  | -6.745789000  | -1.797794000 |
| 6 | 4.805924000  | -7.005816000  | 1.177925000  |
| 1 | 6.051607000  | -5.516927000  | 2.102806000  |
| 6 | 5.926525000  | -9.228750000  | 0.877910000  |
| 6 | 4.979961000  | -8.208760000  | 0.248603000  |
| 1 | 4.004856000  | -8.677654000  | 0.077729000  |
| 1 | 4.388832000  | -7.341206000  | 2.132949000  |
| 6 | 3.855907000  | -5.986304000  | 0.557368000  |
| 8 | 8.182326000  | -9.485312000  | 1.763202000  |
| 1 | 7.992606000  | -8.955969000  | -0.887165000 |
| 1 | 8.845234000  | -7.654515000  | -0.047532000 |
| 1 | 5.655686000  | -8.571073000  | -1.769351000 |
| 6 | 4.589936000  | -6.703355000  | -1.715474000 |
| 1 | 6.042451000  | -10.092206000 | 0.215156000  |
| 1 | 5.522097000  | -9.586074000  | 1.827409000  |
| 6 | 4.423417000  | -5.503592000  | -0.778007000 |
| 1 | 3.613408000  | -7.159778000  | -1.888395000 |
| 1 | 4.979742000  | -6.363335000  | -2.679672000 |
| 1 | 3.729139000  | -5.141043000  | 1.234279000  |
| 1 | 2.878676000  | -6.438457000  | 0.385037000  |
| 1 | 6.203733000  | -4.511989000  | -1.494220000 |
| 1 | 5.678770000  | -3.999292000  | 0.115376000  |
| 1 | 8.284488000  | -10.261679000 | 1.201594000  |
| 8 | 3.513568000  | -4.559328000  | -1.330007000 |
| 1 | 3.855514000  | -4.276745000  | -2.198531000 |
| 6 | 3.489796000  | -2.543485000  | 3.327572000  |
| 6 | 4.505339000  | -1.755124000  | 4.162890000  |
| 6 | 4.348241000  | -0.260023000  | 3.891341000  |

|   |               |              |              |
|---|---------------|--------------|--------------|
| 6 | 4.579334000   | 0.032078000  | 2.406940000  |
| 6 | 3.560248000   | -0.759146000 | 1.585573000  |
| 1 | 5.591762000   | -0.284683000 | 2.129712000  |
| 6 | 4.427005000   | 1.523749000  | 2.127503000  |
| 6 | 3.722000000   | -2.251159000 | 1.846768000  |
| 1 | 5.514880000   | -2.083833000 | 3.905510000  |
| 1 | 4.346588000   | -1.960802000 | 5.225781000  |
| 6 | 2.150511000   | -0.300140000 | 1.965143000  |
| 1 | 3.730957000   | -0.564220000 | 0.523449000  |
| 6 | 2.938855000   | 0.204662000  | 4.268518000  |
| 1 | 5.082916000   | 0.292057000  | 4.488668000  |
| 6 | 2.077632000   | -2.092901000 | 3.715215000  |
| 6 | 1.922196000   | -0.596122000 | 3.448844000  |
| 1 | 0.908800000   | -0.285928000 | 3.728232000  |
| 1 | 2.770273000   | 0.019523000  | 5.335836000  |
| 6 | 2.787369000   | 1.700314000  | 3.996070000  |
| 8 | 3.656210000   | -3.941125000 | 3.502307000  |
| 1 | 3.013619000   | -2.828486000 | 1.250915000  |
| 1 | 4.729057000   | -2.576478000 | 1.579824000  |
| 1 | 1.417213000   | -0.855057000 | 1.368086000  |
| 6 | 1.988604000   | 1.193782000  | 1.696469000  |
| 1 | 1.348585000   | -2.659309000 | 3.131242000  |
| 1 | 1.900872000   | -2.305335000 | 4.774027000  |
| 6 | 3.017335000   | 1.987497000  | 2.510658000  |
| 1 | 0.985269000   | 1.521999000  | 1.975249000  |
| 1 | 2.124806000   | 1.398370000  | 0.633550000  |
| 1 | 3.507730000   | 2.270711000  | 4.584951000  |
| 1 | 1.788414000   | 2.042558000  | 4.271051000  |
| 1 | 4.600210000   | 1.726549000  | 1.066623000  |
| 1 | 5.159820000   | 2.092693000  | 2.704877000  |
| 1 | 3.496526000   | -4.159344000 | 4.426870000  |
| 8 | 2.871131000   | 3.379746000  | 2.311801000  |
| 1 | 3.068851000   | 3.593614000  | 1.383260000  |
| 6 | -6.489400000  | 0.150438000  | -2.467739000 |
| 6 | -6.554183000  | -1.058536000 | -3.405011000 |
| 6 | -7.939906000  | -1.147380000 | -4.038474000 |
| 6 | -9.005658000  | -1.311123000 | -2.951824000 |
| 6 | -8.932981000  | -0.108804000 | -2.007031000 |
| 1 | -8.806388000  | -2.227713000 | -2.385841000 |
| 6 | -10.391936000 | -1.405095000 | -3.581946000 |
| 6 | -7.547066000  | -0.015244000 | -1.374139000 |
| 1 | -6.344197000  | -1.964918000 | -2.832480000 |
| 1 | -5.787912000  | -0.958153000 | -4.177460000 |
| 6 | -9.233945000  | 1.163129000  | -2.804408000 |
| 1 | -9.682410000  | -0.224707000 | -1.216105000 |
| 6 | -8.239959000  | 0.124174000  | -4.836324000 |
| 1 | -7.973319000  | -2.011906000 | -4.711044000 |
| 6 | -6.782311000  | 1.424186000  | -3.260908000 |
| 6 | -8.168580000  | 1.327215000  | -3.891944000 |
| 1 | -8.367081000  | 2.244766000  | -4.458397000 |
| 1 | -7.489956000  | 0.240662000  | -5.627349000 |
| 6 | -9.625896000  | 0.033969000  | -5.470928000 |
| 8 | -5.193804000  | 0.276297000  | -1.902612000 |
| 1 | -7.500826000  | 0.838437000  | -0.694667000 |
| 1 | -7.327748000  | -0.918768000 | -0.800958000 |

|   |               |              |              |
|---|---------------|--------------|--------------|
| 1 | -9.199444000  | 2.027936000  | -2.131822000 |
| 6 | -10.621594000 | 1.075002000  | -3.435539000 |
| 1 | -6.731490000  | 2.284490000  | -2.590198000 |
| 1 | -6.019340000  | 1.551054000  | -4.031868000 |
| 6 | -10.686077000 | -0.133167000 | -4.376561000 |
| 1 | -10.836905000 | 1.990141000  | -3.995834000 |
| 1 | -11.384869000 | 0.967809000  | -2.661737000 |
| 1 | -9.677123000  | -0.817747000 | -6.152746000 |
| 1 | -9.832603000  | 0.940159000  | -6.048768000 |
| 1 | -11.157690000 | -1.526844000 | -2.814325000 |
| 1 | -10.454017000 | -2.263042000 | -4.253161000 |
| 1 | -5.029472000  | -0.521535000 | -1.344133000 |
| 8 | -11.980943000 | -0.280451000 | -4.934915000 |
| 1 | -12.189483000 | 0.512713000  | -5.440860000 |
| 6 | 0.053400000   | -5.241903000 | -1.147269000 |
| 6 | -1.164096000  | -6.105706000 | -0.813909000 |
| 6 | -2.374168000  | -5.215413000 | -0.547651000 |
| 6 | -2.094543000  | -4.277953000 | 0.630120000  |
| 6 | -0.873127000  | -3.417130000 | 0.296526000  |
| 1 | -1.881722000  | -4.875236000 | 1.524073000  |
| 6 | -3.308995000  | -3.391713000 | 0.898428000  |
| 6 | 0.340156000   | -4.304050000 | 0.030927000  |
| 1 | -0.936130000  | -6.716529000 | 0.061481000  |
| 1 | -1.358693000  | -6.780909000 | -1.648814000 |
| 6 | -1.193478000  | -2.571668000 | -0.938360000 |
| 1 | -0.659143000  | -2.752292000 | 1.142778000  |
| 6 | -2.692097000  | -4.370072000 | -1.783606000 |
| 1 | -3.238529000  | -5.846138000 | -0.309587000 |
| 6 | -0.260855000  | -4.393391000 | -2.386722000 |
| 6 | -1.472625000  | -3.507015000 | -2.117575000 |
| 1 | -1.687952000  | -2.907388000 | -3.010105000 |
| 1 | -2.907136000  | -5.033376000 | -2.628765000 |
| 6 | -3.907530000  | -3.484458000 | -1.523986000 |
| 8 | 1.143273000   | -6.102208000 | -1.392940000 |
| 1 | 1.216827000   | -3.695124000 | -0.205254000 |
| 1 | 0.576796000   | -4.900113000 | 0.915192000  |
| 1 | -0.331426000  | -1.936945000 | -1.176716000 |
| 6 | -2.407399000  | -1.685492000 | -0.670406000 |
| 1 | 0.609740000   | -3.781815000 | -2.634696000 |
| 1 | -0.454158000  | -5.057218000 | -3.231887000 |
| 6 | -3.623836000  | -2.555169000 | -0.344117000 |
| 1 | -2.626298000  | -1.073103000 | -1.547597000 |
| 1 | -2.209184000  | -1.018361000 | 0.171232000  |
| 1 | -4.785590000  | -4.093196000 | -1.298502000 |
| 1 | -4.130686000  | -2.882946000 | -2.407647000 |
| 1 | -3.109663000  | -2.722030000 | 1.739003000  |
| 1 | -4.177004000  | -4.005759000 | 1.150384000  |
| 1 | 1.947251000   | -5.550688000 | -1.443147000 |
| 8 | -4.780298000  | -1.755966000 | -0.134405000 |
| 1 | -4.613019000  | -1.164758000 | 0.636777000  |
| 6 | 3.343517000   | 2.424180000  | -3.249127000 |
| 6 | 2.743259000   | 1.640401000  | -2.079099000 |
| 6 | 3.094359000   | 0.162820000  | -2.203049000 |
| 6 | 2.543014000   | -0.402125000 | -3.513821000 |
| 6 | 3.145895000   | 0.384104000  | -4.681312000 |

|   |             |              |              |
|---|-------------|--------------|--------------|
| 1 | 1.453279000 | -0.290048000 | -3.526272000 |
| 6 | 2.891115000 | -1.884253000 | -3.622899000 |
| 6 | 2.793463000 | 1.866311000  | -4.562078000 |
| 1 | 1.657885000 | 1.767512000  | -2.077496000 |
| 1 | 3.138486000 | 2.055352000  | -1.148239000 |
| 6 | 4.665233000 | 0.195458000  | -4.663516000 |
| 1 | 2.744568000 | -0.003327000 | -5.624324000 |
| 6 | 4.614062000 | -0.018180000 | -2.184071000 |
| 1 | 2.649253000 | -0.387742000 | -1.366557000 |
| 6 | 4.866511000 | 2.244730000  | -3.228852000 |
| 6 | 5.217210000 | 0.764438000  | -3.353461000 |
| 1 | 6.308113000 | 0.652136000  | -3.340356000 |
| 1 | 5.017496000 | 0.376768000  | -1.244101000 |
| 6 | 4.968130000 | -1.498434000 | -2.295636000 |
| 8 | 2.994271000 | 3.791274000  | -3.158102000 |
| 1 | 3.217008000 | 2.430485000  | -5.394492000 |
| 1 | 1.710913000 | 2.004416000  | -4.582662000 |
| 1 | 5.107542000 | 0.736210000  | -5.507637000 |
| 6 | 5.016245000 | -1.287588000 | -4.782695000 |
| 1 | 5.305716000 | 2.812085000  | -4.052274000 |
| 1 | 5.263078000 | 2.646771000  | -2.292402000 |
| 6 | 4.408364000 | -2.056255000 | -3.607365000 |
| 1 | 6.103748000 | -1.413193000 | -4.784202000 |
| 1 | 4.628791000 | -1.694175000 | -5.719650000 |
| 1 | 4.542396000 | -2.054987000 | -1.458129000 |
| 1 | 6.054573000 | -1.626715000 | -2.271258000 |
| 1 | 2.491923000 | -2.309991000 | -4.544910000 |
| 1 | 2.465276000 | -2.435383000 | -2.782703000 |
| 1 | 3.272442000 | 4.098236000  | -2.276492000 |
| 8 | 4.676312000 | -3.453434000 | -3.713914000 |
| 1 | 5.626812000 | -3.572240000 | -3.823078000 |

---
